# Supplementary material
Source: PubMed Central journal article supplement (PMC3513590)
Supplement: NIHMS418107-supplement-01.pdf [file NIHMS418107-supplement-01.pdf]

## Supplementary Figure Legends

**Supplemental Figure S1.** (A). Serum estradiol concentrations in proestrus-estrus in F3 generation control and pesticide lineage females. (B). Serum estradiol concentrations in diestrus in F3 generation control and pesticide lineage females. (C). Serum testosterone concentrations in F3 generation control and pesticide lineage males. There were no significant alterations in hormone concentrations of pesticide lineage rats. The means  $\pm$  SEM for control (66 animals) and pesticide lineage (75 animals) for each analysis are presented.

**Supplemental Figure S2.** Testicular spermatogenic cell apoptosis as assessed by Terminal deoxynucleotidyl transferase dUTP nick end labeling (TUNEL) in F1 and F3 generation control (white bars) and pesticide lineage (black bars) rats. Number of apoptotic germ cells was normalized to control means. The means  $\pm$  SEM for three different experiments are presented with relative differences from control lineage.

Supplementary Figure S1

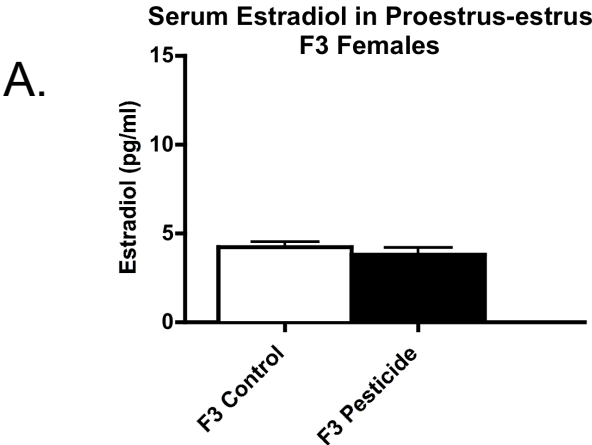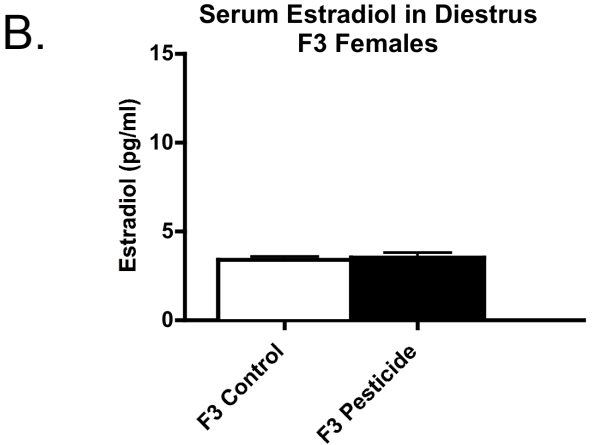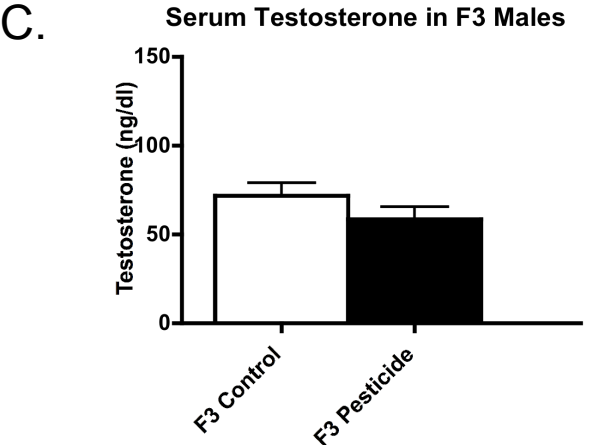

Supplementary Figure S2

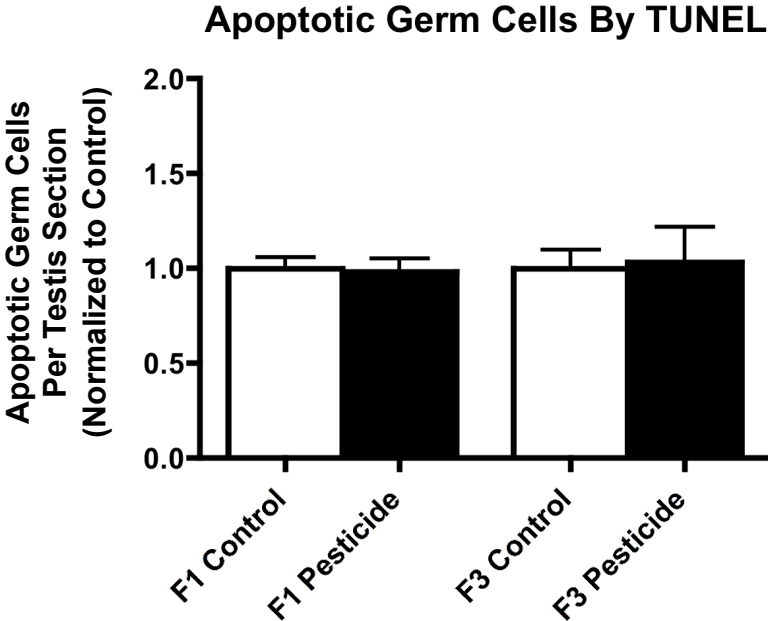

**Supplemental Table S1A.** Body Weight and Organ Weights in Control and Pesticide F1 and F3 Generation Female Rats (Mean  $\pm$  Standard Error).

| Generation | Treatment | Sex | Body Weight (grams)  | Ovaries (% of BW)      | Uterus (% BW)           | Kidney (% BW)          |
|------------|-----------|-----|----------------------|------------------------|-------------------------|------------------------|
| F1         | Control   | F   | 310.9<br>$\pm$ 6.15  | 0.0532<br>$\pm$ 0.0032 | 0.2589<br>$\pm$ 0.0209  | 0.3276<br>$\pm$ 0.0127 |
| F1         | Pesticide | F   | 304.1<br>$\pm$ 11.21 | 0.0486<br>$\pm$ 0.0037 | 0.2794<br>$\pm$ 0.0330  | 0.3351<br>$\pm$ 0.0110 |
| F3         | Control   | F   | 293.6<br>$\pm$ 2.31  | 0.0501<br>$\pm$ 0.0011 | 0.3883<br>$\pm$ 0.0150  | 0.3567<br>$\pm$ 0.0036 |
| F3         | Pesticide | F   | 303.0*<br>$\pm$ 4.00 | 0.0497<br>$\pm$ 0.0021 | 0.3208*<br>$\pm$ 0.0143 | 0.3499<br>$\pm$ 0.0052 |

Asterisks (\*, \*\*), if present, indicate statistically significant differences between means of Control and Pesticide generation rats ( $P < 0.05$ ,  $P < 0.01$  respectively).

**Supplemental Table S1B.** Body Weight and Organ Weights in Control and Pesticide F1 and F3 Generation Male Rats (Mean  $\pm$  Standard Error).

| Generation | Treatment | Sex | Body Weight (grams)  | Testis (% BW)          | Prostate (% BW)        | Seminal Vesicle (% BW) | Epididymis (% BW)       | Kidney (% BW)            |
|------------|-----------|-----|----------------------|------------------------|------------------------|------------------------|-------------------------|--------------------------|
| F1         | Control   | M   | 545.3<br>$\pm$ 8.66  | 0.7599<br>$\pm$ 0.0154 | 0.2239<br>$\pm$ 0.0076 | 0.1395<br>$\pm$ 0.0092 | 0.2585<br>$\pm$ 0.0045  | 0.3821<br>$\pm$ 0.0092   |
| F1         | Pesticide | M   | 538.0<br>$\pm$ 12.61 | 0.7480<br>$\pm$ 0.0209 | 0.1985<br>$\pm$ 0.0138 | 0.1331<br>$\pm$ 0.0098 | 0.2415*<br>$\pm$ 0.0072 | 0.3365**<br>$\pm$ 0.0064 |
| F3         | Control   | M   | 515.80<br>$\pm$ 6.09 | 0.8153<br>$\pm$ 0.0102 | 0.1970<br>$\pm$ 0.0041 | 0.1330<br>$\pm$ 0.0038 | 0.2628<br>$\pm$ 0.0028  | 0.3791<br>$\pm$ 0.0010   |
| F3         | Pesticide | M   | 531.4<br>$\pm$ 8.00  | 0.7948<br>$\pm$ 0.0126 | 0.2010<br>$\pm$ 0.0048 | 0.1286<br>$\pm$ 0.0042 | 0.2543<br>$\pm$ 0.0042  | 0.3599<br>$\pm$ 0.0072   |

Asterisks (\*, \*\*), if present, indicate statistically significant differences between means of Control and Pesticide generation rats ( $P < 0.05$ ,  $P < 0.01$  respectively).

**Supplemental Table S2A.** Individual disease incidence in F1 generation female rats of control and pesticide lineages.

| Animal | Animal ID  | Sex | Age  | Puberty | PFL | PCO | Kidney | Tumor | Obesity | Total Disease |
|--------|------------|-----|------|---------|-----|-----|--------|-------|---------|---------------|
| C1     | DCS0-1-1-1 | F   | 1 Yr | -       | -   | -   | -      | -     | -       |               |
| C2     | DCS0-1-1-2 | F   | 1 Yr | -       |     |     | -      | -     | -       |               |
| C3     | DCS0-1-1-3 | F   | 1 Yr | -       |     |     | +      | -     | -       | 1             |
| C4     | DCR1-1-2-1 | F   | 1 Yr | -       | -   | -   | -      | -     | -       |               |
| C5     | DCR1-1-2-2 | F   | 1 Yr | -       |     |     | -      | -     | -       |               |
| C6     | DCR1-1-2-3 | F   | 1 Yr | -       |     |     |        | +     | -       | 1             |
| C7     | DCB1-1-3-1 | F   | 1 Yr | -       |     |     | -      | -     | -       |               |
| C8     | DCB1-1-3-2 | F   | 1 Yr | -       |     |     |        | -     | -       |               |
| C9     | DCF1-1-4-1 | F   | 1 Yr | -       | -   | -   | -      | +     | -       | 1             |
| C10    | DCF1-1-4-2 | F   | 1 Yr | -       | -   | -   | -      | -     | -       |               |
| C11    | DCF1-1-4-3 | F   | 1 Yr | -       | -   | -   | +      | -     | -       | 1             |
| C12    | DCL1-1-5-1 | F   | 1 Yr | -       | +   | -   | +      | -     | -       | 2             |
| C13    | DCL1-1-5-2 | F   | 1 Yr | -       |     |     | -      | -     | -       |               |
| C14    | DCL1-1-5-3 | F   | 1 Yr | -       | -   | -   | -      | -     | -       |               |
| C15    | DCM2-1-6-1 | F   | 1 Yr | -       | -   | -   | -      | -     | -       |               |
| C16    | DCM2-1-6-2 | F   | 1 Yr | +       |     |     | -      | -     | -       | 1             |
| C17    | DCM2-1-6-3 | F   | 1 Yr | +       | -   | -   | -      | -     | -       | 1             |
| C18    | DCF0-1-7-1 | F   | 1 Yr | -       |     |     | -      | -     | -       |               |
| C19    | DCF0-1-7-2 | F   | 1 Yr | -       |     |     | -      | -     | -       |               |
| C20    | DCF0-1-7-3 | F   | 1 Yr | -       |     |     | -      | -     | -       |               |

| Animal | Animal ID  | Sex | Age  | Puberty | PFL | PCO | Kidney | Tumor | Obesity | Total Disease |
|--------|------------|-----|------|---------|-----|-----|--------|-------|---------|---------------|
| P1     | DPM2-1-1-1 | F   | 1 Yr | +       | +   | -   | -      | -     | -       | 2             |
| P2     | DPM2-1-1-2 | F   | 1 Yr | -       | -   | +   |        | -     | -       | 1             |
| P3     | DPS1-1-2-1 | F   | 1 Yr | +       | +   | +   | +      | -     | -       | 4             |
| P4     | DPS1-1-2-2 | F   | 1 Yr | +       | +   | +   | +      | -     | -       | 4             |
| P5     | DPS1-1-2-3 | F   | 1 Yr | +       | +   | +   | -      | -     | -       | 3             |
| P6     | DPZ0-1-4-1 | F   | 1 Yr | -       | +   | +   | -      | -     | -       | 2             |
| P7     | DPZ0-1-4-2 | F   | 1 Yr | -       | +   | -   | +      | -     | -       | 2             |
| P8     | DPZ0-1-4-3 | F   | 1 Yr | +       | +   | +   | +      | -     | -       | 4             |

A '+' indicates the presence of disease; A '-' indicates the absence of disease; A blank cell indicates 'not evaluated.' Animal IDs with a 'C' belong to control lineage and those with a 'P' belong to pesticide lineage. PFL = Primordial follicle loss; PCO= Polycystic ovarian disease. See 'Materials and Methods' section for disease assessment in rats. The number of animals per litter (litter representation) mean  $\pm$  SEM used for each specific disease/abnormality was found not to be statistically different between the control versus pesticide lineage animals.

**Supplemental Table S2B.** Individual disease incidence in F1 generation male rats of control and pesticide lineages.

| Animal | Animal ID   | Sex | Age  | Puberty | Testis | Prostate | Kidney | Tumor | Obesity | Total Disease |
|--------|-------------|-----|------|---------|--------|----------|--------|-------|---------|---------------|
| C1     | DCS0-1-1-5  | M   | 1 Yr | -       | +      | -        | -      | -     | -       | 1             |
| C2     | DCS0-1-1-6  | M   | 1 Yr | -       | -      | -        | -      | -     | -       |               |
| C3     | DCR1-1-2-5  | M   | 1 Yr | -       | -      | -        | -      | -     | -       |               |
| C4     | DCR1-1-2-6  | M   | 1 Yr | -       | -      | -        | -      | -     | -       |               |
| C5     | DCR1-1-2-7  | M   | 1 Yr | -       | -      | +        | -      | -     | -       | 1             |
| C6     | DCR1-1-2-8  | M   | 1 Yr | -       | -      | -        | -      | -     | -       |               |
| C7     | DCB1-1-3-3  | M   | 1 Yr | -       | +      | -        | -      | -     | -       | 1             |
| C8     | DCB1-1-3-4  | M   | 1 Yr | -       | -      | -        | -      | -     | -       |               |
| C9     | DCF1-1-4-6  | M   | 1 Yr | -       | -      | -        | -      | -     | -       |               |
| C10    | DCF1-1-4-7  | M   | 1 Yr | +       | -      | +        | -      | -     | -       | 2             |
| C11    | DCF1-1-4-8  | M   | 1 Yr | -       | -      | -        | -      | -     | -       |               |
| C12    | DCF1-1-4-9  | M   | 1 Yr | +       | -      | -        | -      | -     | -       | 1             |
| C13    | DCL1-1-5-6  | M   | 1 Yr | -       | -      | -        | -      | -     | -       |               |
| C14    | DCL1-1-5-7  | M   | 1 Yr | -       | -      | +        | -      | -     | -       | 1             |
| C15    | DCL1-1-5-8  | M   | 1 Yr | -       | -      | -        | -      | -     | -       |               |
| C16    | DCL1-1-5-9  | M   | 1 Yr | -       | -      | +        | -      | -     | -       | 1             |
| C17    | DCM2-1-6-7  | M   | 1 Yr | +       | -      | +        | -      | -     | -       | 2             |
| C18    | DCM2-1-6-9  | M   | 1 Yr | +       | +      | -        | -      | -     | -       | 2             |
| C19    | DCM2-1-6-10 | M   | 1 Yr | -       | +      | -        | -      | -     | -       | 1             |
| C20    | DCF0-1-7-5  | M   | 1 Yr | -       | -      | -        | -      | -     | -       |               |
| C21    | DCF0-1-7-6  | M   | 1 Yr | -       | -      | -        | +      | -     | -       | 1             |
| C22    | DCF0-1-7-7  | M   | 1 Yr | -       | -      | -        | -      | -     | -       |               |



| Animal | Animal ID   | Sex | Age  | Puberty | Testis | Prostate | Kidney | Tumor | Obesity | Total Disease |
|--------|-------------|-----|------|---------|--------|----------|--------|-------|---------|---------------|
| P1     | DPM2-1-1-3  | M   | 1 Yr | +       | +      | -        | -      | -     | -       | 2             |
| P2     | DPM2-1-1-4  | M   | 1 Yr | +       | -      | -        | +      | -     | -       | 2             |
| P3     | DPS1-1-2-7  | M   | 1 Yr | -       | -      | +        | -      | -     | -       | 1             |
| P4     | DPS1-1-2-8  | M   | 1 Yr | -       | +      | -        | -      | -     | -       | 1             |
| P5     | DPS1-1-2-11 | M   | 1 Yr | -       | -      | -        | +      | -     | -       | 1             |
| P6     | DPK1-1-3-1  | M   | 1 Yr | -       | +      | -        | +      | -     | -       | 2             |
| P7     | DPK1-1-3-2  | M   | 1 Yr | +       |        | -        | -      | -     | -       | 1             |
| P8     | DPZ0-1-4-6  | M   | 1 Yr | -       | +      | +        | -      | -     | -       | 2             |
| P9     | DPZ0-1-4-7  | M   | 1 Yr | -       | -      | -        | -      | -     | -       |               |
| P10    | DPZ0-1-4-8  | M   | 1 Yr | -       | +      | +        |        | -     | -       | 2             |
| P11    | DPZ0-1-4-9  | M   | 1 Yr | +       | +      | +        | +      | -     | -       | 4             |

A '+' indicates the presence of disease; A '-' indicates the absence of disease; A blank cell indicates 'not evaluated.' Animal IDs with a 'C' belong to control lineage and those with a 'P' belong to pesticide lineage. See 'Materials and Methods' section for disease assessment in rats. The number of animals per litter (litter representation) mean  $\pm$  SEM used for each specific disease/abnormality was found not to be statistically different between the control versus pesticide lineage animals.

**Supplemental Table S3A.** Individual Disease Incidence in F3 Generation Control and Pesticide Female Rats.

| Animal | Animal ID  | Sex | Age  | Puberty | PFL | PCO | Kidney | Tumor | Obesity | Total Disease |
|--------|------------|-----|------|---------|-----|-----|--------|-------|---------|---------------|
| C1     | DCF1-3-1-2 | F   | 1 Yr | -       |     |     | -      | -     | -       |               |
| C2     | DCF1-3-1-3 | F   | 1 Yr | -       |     |     | -      | -     | -       |               |
| C3     | DCF1-3-1-4 | F   | 1 Yr | -       |     |     | -      | -     | -       |               |
| C4     | DCF1-3-1-5 | F   | 1 Yr | -       |     |     |        | -     | -       |               |
| C5     | DCS0-3-2-2 | F   | 1 Yr | -       |     |     | -      | -     | -       |               |
| C6     | DCS0-3-2-3 | F   | 1 Yr | -       | -   | -   | -      | -     | -       |               |
| C7     | DCS0-3-2-4 | F   | 1 Yr | -       |     |     |        | -     | -       |               |
| C8     | DCS0-3-2-5 | F   | 1 Yr | -       |     |     |        | -     | -       |               |
| C9     | DCL1-3-3-2 | F   | 1 Yr | -       | -   | -   | +      | -     | -       | 1             |
| C10    | DCL1-3-3-3 | F   | 1 Yr | -       |     |     |        | +     | -       | 1             |
| C11    | DCB1-3-4-2 | F   | 1 Yr | -       |     |     | -      | -     | -       |               |
| C12    | DCB1-3-4-3 | F   | 1 Yr | -       |     |     | -      | -     | -       |               |
| C13    | DCB1-3-4-4 | F   | 1 Yr | -       |     |     | -      | -     | -       |               |
| C14    | DCB1-3-4-5 | F   | 1 Yr | -       | -   | -   |        | -     | -       |               |
| C15    | DCB1-3-4-6 | F   | 1 Yr | -       |     |     |        | -     | -       |               |
| C16    | DCS0-3-5-2 | F   | 1 Yr | -       |     |     | +      | -     | -       | 1             |
| C17    | DCS0-3-5-3 | F   | 1 Yr | -       |     |     | -      | -     | -       |               |
| C18    | DCS0-3-5-4 | F   | 1 Yr | -       |     |     | -      | -     | -       |               |
| C19    | DCS0-3-5-5 | F   | 1 Yr | -       |     |     | -      | -     | -       |               |
| C20    | DCS0-3-5-6 | F   | 1 Yr | -       | -   | -   |        | -     | -       |               |
| C21    | DCS0-3-6-2 | F   | 1 Yr | -       |     |     | +      | -     | -       | 1             |
| C22    | DCS0-3-6-3 | F   | 1 Yr | -       | +   | -   | -      | -     | -       | 1             |
| C23    | DCB1-3-7-2 | F   | 1 Yr | -       | -   | -   |        | -     | -       |               |

| Animal | Animal ID   | Sex | Age   | Puberty | PFL | PCO | Kidney | Tumor | Obesity | Total Disease |
|--------|-------------|-----|-------|---------|-----|-----|--------|-------|---------|---------------|
| C24    | DCB1-3-7-3  | F   | 1 Yr  | -       |     |     | -      | -     | -       |               |
| C25    | DCB1-3-7-4  | F   | 1 Yr  | -       |     |     |        | -     | -       |               |
| C26    | DCB1-3-7-5  | F   | 1 Yr  | -       |     |     |        | -     | -       |               |
| C27    | DCB1-3-7-6  | F   | 1 Yr  | -       |     |     |        | -     | -       |               |
| C28    | DCR1-3-8-2  | F   | 1 Yr  | -       | -   | -   |        | -     | -       |               |
| C29    | DCR1-3-8-3  | F   | 1 Yr  | -       |     |     | -      | -     | -       |               |
| C30    | DCR1-3-8-4  | F   | 1 Yr  | -       |     |     | -      | -     | -       |               |
| C31    | DCR1-3-8-5  | F   | 1 Yr  | -       |     |     |        | -     | -       |               |
| C32    | DCF1-3-9-2  | F   | 1 Yr  | -       | -   | -   |        | -     | -       |               |
| C33    | DCF1-3-9-3  | F   | 1 Yr  | -       |     |     | -      | -     | -       |               |
| C34    | DCF1-3-9-4  | F   | 1 Yr  | +       |     |     | -      | -     | -       | 1             |
| C35    | DCF1-3-9-5  | F   | 1 Yr  |         |     |     |        | -     | -       |               |
| C36    | DCB1-3-10-2 | F   | 1 Yr  | -       |     |     |        | -     | -       |               |
| C37    | DCB1-3-10-3 | F   | 1 Yr  | -       | -   | -   | -      | -     | -       |               |
| C38    | DCB1-3-10-4 | F   | 1 Yr  | -       |     |     | -      | -     | -       |               |
| C39    | DCL1-3-11-2 | F   | 10 m. | -       |     |     |        | +     | -       | 1             |
| C40    | DCL1-3-11-3 | F   | 1 Yr  | -       |     |     | -      | -     | -       |               |
| C41    | DCL1-3-11-4 | F   | 1 Yr  | -       |     |     | -      | -     | -       |               |
| C42    | DCL1-3-11-5 | F   | 1 Yr  | -       |     |     | -      | -     | -       |               |
| C43    | DCL1-3-11-6 | F   | 1 Yr  | -       |     |     |        | -     | -       |               |
| C44    | DCL1-3-11-8 | F   | 11 m. | -       |     |     |        | +     | -       | 1             |
| C45    | DCB1-3-12-2 | F   | 1 Yr  | -       |     |     |        | -     | -       |               |
| C46    | DCB1-3-12-3 | F   | 1 Yr  | -       |     |     | -      | -     | -       |               |
| C47    | DCL1-3-13-1 | F   | 1 Yr  | -       |     |     | -      | -     | -       |               |
| C48    | DCL1-3-13-2 | F   | 1 Yr  | -       |     |     |        | -     | -       |               |

| Animal | Animal ID   | Sex | Age   | Puberty | PFL | PCO | Kidney | Tumor | Obesity | Total Disease |
|--------|-------------|-----|-------|---------|-----|-----|--------|-------|---------|---------------|
| C49    | DCL1-3-13-3 | F   | 1 Yr  | -       |     |     | -      | -     | -       |               |
| C50    | DCS0-3-14-2 | F   | 1 Yr  | -       |     |     |        | -     | -       |               |
| C51    | DCS0-3-14-3 | F   | 1 Yr  | -       |     |     | -      | -     | -       |               |
| C52    | DCL1-3-15-2 | F   | 1 Yr  | +       |     |     | -      | -     | -       | 1             |
| C53    | DCL1-3-15-3 | F   | 1 Yr  | +       |     |     | +      | -     | -       | 2             |
| C54    | DCL1-3-15-4 | F   | 1 Yr  | +       |     |     | +      | -     | -       | 2             |
| C55    | DCL1-3-15-5 | F   | 1 Yr  | -       |     |     |        | -     | -       |               |
| C56    | DCS0-3-16-2 | F   | 1 Yr  | -       |     |     |        | -     | -       |               |
| C57    | DCS0-3-16-3 | F   | 1 Yr  | -       |     |     | -      | -     | -       |               |
| C58    | DCS0-3-16-4 | F   | 1 Yr  | -       |     |     | -      | -     | -       |               |
| C59    | DCS0-3-16-5 | F   | 1 Yr  | -       |     |     |        | -     | -       |               |
| C60    | DCR1-3-17-1 | F   | 1 Yr  | -       |     |     |        | -     | -       |               |
| C61    | DCR1-3-17-2 | F   | 1 Yr  | -       |     |     | -      | -     | -       |               |
| C62    | DCR1-3-17-3 | F   | 1 Yr  | -       |     |     | -      | -     | -       |               |
| C63    | DCR1-3-17-4 | F   | 1 Yr  | +       |     |     |        | -     | -       | 1             |
| C64    | DCS0-3-18-2 | F   | 1 Yr  |         |     |     |        | -     | -       |               |
| C65    | DCS0-3-18-3 | F   | 1 Yr  |         |     |     | -      | -     | -       |               |
| C66    | DCS0-3-18-4 | F   | 1 Yr  |         |     |     | -      | -     | -       |               |
| C67    | DCF1-3-19-1 | F   | 1 Yr  | -       |     |     |        | -     | -       |               |
| C68    | DCF1-3-19-2 | F   | 1 Yr  | -       |     |     | -      | -     | -       |               |
| C69    | DCF1-3-19-3 | F   | 11 m. | -       |     |     |        | +     | -       |               |
| P1     | DPS1-3-1-3  | F   | 1 Yr  | -       |     |     | -      | -     | -       |               |
| P2     | DPS1-3-1-4  | F   | 6 m.  | -       |     |     |        | +     | -       | 1             |
| P3     | DPS1-3-1-5  | F   | 1 Yr  | +       | +   | +   | -      | -     | -       | 3             |

| Animal | Animal ID   | Sex | Age   | Puberty | PFL | PCO | Kidney | Tumor | Obesity | Total Disease |
|--------|-------------|-----|-------|---------|-----|-----|--------|-------|---------|---------------|
| P4     | DPS1-3-1-6  | F   | 1 Yr  | -       |     |     |        | -     | -       |               |
| P5     | DPS1-3-2-3  | F   | 1 Yr  | -       | +   | +   | -      | -     | -       | 2             |
| P6     | DPM2-3-3-3  | F   | 1 Yr  | +       | +   | +   | -      | -     | -       | 3             |
| P7     | DPS1-3-4-2  | F   | 1 Yr  | -       |     |     | -      | -     | -       |               |
| P8     | DPS1-3-4-3  | F   | 1 Yr  | -       | +   | +   | -      | -     | -       | 2             |
| P9     | DPM2-3-5-2  | F   | 1 Yr  | -       | +   | +   | -      | -     | -       | 2             |
| P10    | DPM2-3-6-3  | F   | 1 Yr  | +       | +   | +   | -      | -     | -       | 3             |
| P11    | DPS1-3-7-3  | F   | 1 Yr  | +       |     |     | -      | -     | -       | 1             |
| P12    | DPS1-3-7-4  | F   | 1 Yr  | +       |     |     | -      | -     | -       | 1             |
| P13    | DPS1-3-7-5  | F   | 1 Yr  | +       | +   | +   | -      | -     | -       | 3             |
| P14    | DPS1-3-7-6  | F   | 1 Yr  | +       |     |     |        | -     | -       | 1             |
| P15    | DPZ0-3-8-3  | F   | 1 Yr  | +       |     |     | -      | -     | -       | 1             |
| P16    | DPZ0-3-8-5  | F   | 1 Yr  | +       |     |     | -      | -     | -       | 1             |
| P17    | DPZ0-3-8-6  | F   | 1 Yr  | +       | +   | +   | -      | -     | -       | 3             |
| P18    | DPZ0-3-9-2  | F   | 1 Yr  | +       |     |     | -      | -     | -       | 1             |
| P19    | DPZ0-3-9-3  | F   | 1 Yr  | +       | +   | +   | -      | -     | -       | 3             |
| P20    | DPZ0-3-9-4  | F   | 8 m.  | +       |     |     |        | +     | -       | 2             |
| P21    | DPZ0-3-9-5  | F   | 1 Yr  | +       |     |     | -      | -     | -       | 1             |
| P22    | DPS1-3-10-2 | F   | 1 Yr  | -       |     |     | -      | -     | -       |               |
| P23    | DPS1-3-10-3 | F   | 11 m. | -       |     |     |        | +     | -       | 1             |
| P24    | DPS1-3-10-4 | F   | 1 Yr  | -       |     |     | -      | -     | -       |               |
| P25    | DPS1-3-10-5 | F   | 1 Yr  | -       |     |     | -      | -     | -       |               |
| P26    | DPS1-3-10-6 | F   | 11 m. | -       |     |     |        | +     | -       | 1             |
| P27    | DPZ0-3-11-1 | F   | 1 Yr  |         |     |     | -      | -     | -       |               |
| P28    | DPZ0-3-11-2 | F   | 1 Yr  |         |     |     | -      | -     | -       |               |

| Animal | Animal ID   | Sex | Age  | Puberty | PFL | PCO | Kidney | Tumor | Obesity | Total Disease |
|--------|-------------|-----|------|---------|-----|-----|--------|-------|---------|---------------|
| P29    | DPZ0-3-11-3 | F   | 1 Yr |         |     |     | -      | -     | -       |               |
| P30    | DPM2-3-12-1 | F   | 1 Yr | -       |     |     | -      | -     | -       |               |
| P31    | DPM2-3-12-2 | F   | 1 Yr | -       |     |     | -      | -     | -       |               |
| P32    | DPM2-3-12-3 | F   | 1 Yr | -       |     |     | -      | -     | -       |               |
| P33    | DPM2-3-13-1 | F   | 1 Yr | +       |     |     |        | -     | -       | 1             |
| P34    | DPM2-3-13-3 | F   | 1 Yr | +       |     |     |        | -     | -       | 1             |
| P35    | DPM2-3-13-5 | F   | 1 Yr | +       |     |     |        | -     | -       | 1             |
| P36    | DPM2-3-13-6 | F   | 1 Yr | +       |     |     |        | -     | -       | 1             |
| P37    | DPM2-3-13-7 | F   | 1 Yr | -       |     |     |        | -     | -       |               |

A '+' indicates the presence of disease; A '-' indicates the absence of disease. A blank cell indicates 'not evaluated.' Animal IDs with a 'C' belong to Control lineage and those with a 'P' belong to Pesticide lineage. PFL = Primordial Follicle Loss; PCO = Polycystic Ovarian Disease. See 'Materials and Methods' section for disease assessment in rats. The number of animals per litter (litter representation) mean  $\pm$  SEM used for each specific disease/abnormality was found not to be statistically different between the control versus pesticide lineage animals.

**Supplemental Table S3B.** Individual Disease Incidence in F3 Generation Control and Pesticide Male Rats.

| Animal | Animal ID   | Sex | Age  | Pubertal | Testis | Prostate | Kidney | Tumor | Obesity | Total Disease |
|--------|-------------|-----|------|----------|--------|----------|--------|-------|---------|---------------|
| C1     | DCF1-3-1-8  | M   | 1 Yr | -        | +      |          | -      | -     | -       | 1             |
| C2     | DCF1-3-1-9  | M   | 1 Yr | -        |        | -        | -      | -     | -       |               |
| C3     | DCF1-3-1-10 | M   | 1 Yr | -        |        | -        | +      | -     | -       | 1             |
| C4     | DCS0-3-2-11 | M   | 1 Yr | -        | -      | -        | -      | -     | -       |               |
| C5     | DCS0-3-2-12 | M   | 1 Yr | -        | -      | -        | -      | -     | -       |               |
| C6     | DCS0-3-2-13 | M   | 1 Yr | -        | -      |          | -      | -     | -       |               |
| C7     | DCL1-3-3-6  | M   | 1 Yr | -        | -      | -        |        | -     | -       |               |
| C8     | DCL1-3-3-7  | M   | 1 Yr | -        | -      | -        |        | -     | -       |               |
| C9     | DCB1-3-4-9  | M   | 1 Yr | -        | -      | +        | -      | -     | -       | 1             |
| C10    | DCB1-3-4-10 | M   | 1 Yr | -        | -      | -        | -      | -     | -       |               |
| C11    | DCB1-3-4-11 | M   | 1 Yr | -        | -      | -        | -      | -     | -       |               |
| C12    | DCB1-3-4-12 | M   | 1 Yr | -        |        |          |        | -     | -       |               |
| C13    | DCB1-3-4-13 | M   | 1 Yr | -        |        |          |        | -     | -       |               |
| C14    | DCS0-3-5-9  | M   | 1 Yr | -        | -      |          | -      | -     | -       |               |
| C15    | DCS0-3-5-10 | M   | 1 Yr | -        | -      | -        | -      | -     | -       |               |
| C16    | DCS0-3-5-11 | M   | 1 Yr | -        | -      | -        | -      | -     | -       |               |
| C17    | DCS0-3-6-6  | M   | 1 Yr | -        | -      |          | -      | -     | -       |               |
| C18    | DCS0-3-6-7  | M   | 1 Yr | -        | -      | -        | -      | -     | -       |               |
| C19    | DCS0-3-6-8  | M   | 1 Yr | -        | +      | -        | -      | -     | -       | 1             |
| C20    | DCB1-3-7-9  | M   | 1 Yr | -        | -      |          | +      | -     | -       | 1             |
| C21    | DCB1-3-7-10 | M   | 1 Yr | -        | -      | -        | -      | -     | -       |               |
| C22    | DCB1-3-7-11 | M   | 1 Yr | -        | -      | -        | -      | -     | -       |               |
| C23    | DCR1-3-8-7  | M   | 1 Yr | -        | -      | -        | -      | -     | -       |               |
| C24    | DCR1-3-8-8  | M   | 1 Yr | -        | -      | -        | -      | -     | -       |               |

| Animal | Animal ID    | Sex | Age  | Pubertal | Testis | Prostate | Kidney | Tumor | Obesity | Total Disease |
|--------|--------------|-----|------|----------|--------|----------|--------|-------|---------|---------------|
| C25    | DCF1-3-9-11  | M   | 1 Yr | -        | -      | -        | -      | -     | -       |               |
| C26    | DCF1-3-9-12  | M   | 1 Yr | -        | -      | -        | -      | -     | -       |               |
| C27    | DCF1-3-9-13  | M   | 1 Yr | +        | -      | -        | -      | -     | -       | 1             |
| C28    | DCB1-3-10-9  | M   | 9 m. | -        | -      | -        | -      | +     | -       | 1             |
| C29    | DCB1-3-10-10 | M   | 1 Yr | -        | -      | -        | -      | -     | -       |               |
| C30    | DCB1-3-10-11 | M   | 1 Yr | -        | -      | -        | -      | -     | -       |               |
| C31    | DCB1-3-10-12 | M   | 1 Yr | -        | +      | -        | -      | -     | -       | 1             |
| C32    | DCB1-3-10-13 | M   | 11m. | -        | -      | -        | -      | +     | -       | 1             |
| C33    | DCL1-3-11-9  | M   | 1 Yr | -        | -      | -        | -      | -     | -       |               |
| C34    | DCL1-3-11-10 | M   | 1 Yr | -        | -      | +        | -      | -     | -       | 1             |
| C35    | DCL1-3-11-11 | M   | 1 Yr | -        | -      | -        | -      | -     | -       |               |
| C36    | DCB1-3-12-6  | M   | 1 Yr | -        | -      | -        | -      | -     | -       |               |
| C37    | DCB1-3-12-7  | M   | 1 Yr | -        | +      | +        | -      | -     | -       | 2             |
| C38    | DCB1-3-12-8  | M   | 1 Yr | -        | +      | -        | -      | -     | -       | 1             |
| C39    | DCL1-3-13-4  | M   | 1 Yr | -        | -      | -        | -      | -     | -       |               |
| C40    | DCS0-3-14-5  | M   | 1 Yr | -        | -      | -        | -      | -     | -       |               |
| C41    | DCS0-3-14-6  | M   | 1 Yr | -        | -      | -        | -      | -     | -       |               |
| C42    | DCS0-3-14-7  | M   | 1 Yr | -        | -      | -        | -      | -     | -       |               |
| C43    | DCL1-3-15-7  | M   | 1 Yr | +        | -      | -        | -      | -     | -       | 1             |
| C44    | DCL1-3-15-8  | M   | 1 Yr | +        | -      | +        | -      | -     | -       | 2             |
| C45    | DCL1-3-15-9  | M   | 1 Yr | +        | -      | -        | -      | -     | -       | 1             |
| C46    | DCS0-3-16-9  | M   | 1 Yr | -        | -      | -        | -      | -     | -       |               |
| C47    | DCS0-3-16-10 | M   | 1 Yr | -        | -      | -        | -      | -     | -       |               |
| C48    | DCS0-3-16-11 | M   | 1 Yr | -        | -      | -        | -      | -     | -       |               |
| C49    | DCS0-3-16-13 | M   | 1 Yr | -        | -      | -        | -      | -     | -       |               |



| Animal | Animal ID    | Sex | Age  | Pubertal | Testis | Prostate | Kidney | Tumor | Obesity | Total Disease |
|--------|--------------|-----|------|----------|--------|----------|--------|-------|---------|---------------|
| C50    | DCR1-3-17-6  | M   | 1 Yr | -        |        | -        | -      | -     | -       |               |
| C51    | DCS0-3-18-10 | M   | 1 Yr |          |        | -        | +      | -     | -       | 1             |
| C52    | DCS0-3-18-11 | M   | 1 Yr |          | +      | -        | +      | -     | -       | 2             |
| C53    | DCS0-3-18-12 | M   | 1 Yr |          | -      |          | -      | -     | -       |               |
| C54    | DCF1-3-19-4  | M   | 1 Yr | -        | -      |          | -      | -     | -       |               |
| C55    | DCF1-3-19-5  | M   | 1 Yr | -        | -      | -        |        | -     | -       |               |
| C56    | DCF1-3-19-6  | M   | 1 Yr | -        | -      | -        | -      | -     | -       |               |
| P1     | DPS1-3-1-10  | M   | 1 Yr | -        | +      | -        | -      | -     | -       | 1             |
| P2     | DPS1-3-1-11  | M   | 1 Yr | -        | -      | -        | -      | -     | -       |               |
| P3     | DPS1-3-1-12  | M   | 1 Yr | -        | -      | -        | -      | -     | -       |               |
| P4     | DPS1-3-2-7   | M   | 1 Yr | -        | -      | -        | +      | -     | -       | 1             |
| P5     | DPS1-3-2-8   | M   | 1 Yr | +        | -      | -        | +      | -     | -       | 2             |
| P6     | DPS1-3-2-9   | M   | 1 Yr | -        | -      | +        | -      | -     | -       | 1             |
| P7     | DPM2-3-3-7   | M   | 1 Yr | -        | -      | -        | -      | -     | -       |               |
| P8     | DPM2-3-3-8   | M   | 1 Yr | -        | -      | -        | +      | -     | -       | 1             |
| P9     | DPM2-3-3-9   | M   | 1 Yr | -        | -      | -        | -      | -     | -       |               |
| P10    | DPM2-3-3-10  | M   | 1 Yr | -        |        |          |        | -     | -       |               |
| P11    | DPS1-3-4-6   | M   | 1 Yr | -        | +      | -        | -      | -     | -       | 1             |
| P12    | DPZ0-3-5-4   | M   | 1 Yr | -        | -      | -        | -      | -     | -       |               |
| P13    | DPZ0-3-5-5   | M   | 1 Yr | -        | -      | -        | -      | -     | -       |               |
| P14    | DPZ0-3-5-6   | M   | 1 Yr | -        |        |          |        | -     | -       |               |
| P15    | DPM2-3-6-6   | M   | 1 Yr | -        | +      | -        | -      | -     | -       | 1             |
| P16    | DPM2-3-6-7   | M   | 1 Yr | -        | +      | -        | -      | -     | -       | 1             |
| P17    | DPM2-3-6-8   | M   | 1 Yr | -        | -      | -        | -      | -     | -       |               |
| P18    | DPS1-3-7-11  | M   | 1 Yr | -        | -      | +        | -      | -     | -       | 1             |

| Animal | Animal ID    | Sex | Age  | Pubertal | Testis | Prostate | Kidney | Tumor | Obesity | Total Disease |
|--------|--------------|-----|------|----------|--------|----------|--------|-------|---------|---------------|
| P19    | DPS1-3-7-12  | M   | 1 Yr | +        | +      | -        | -      | -     | -       | 2             |
| P20    | DPS1-3-7-13  | M   | 1 Yr | +        | -      | +        | -      | -     | -       | 2             |
| P21    | DPZ0-3-8-9   | M   | 1 Yr | +        | -      | -        | +      | -     | -       | 2             |
| P22    | DPZ0-3-8-10  | M   | 1 Yr | +        | -      | -        | -      | -     | -       | 1             |
| P23    | DPZ0-3-9-8   | M   | 1 Yr | -        | +      | -        | -      | -     | -       | 1             |
| P24    | DPZ0-3-9-9   | M   | 1 Yr | -        | -      | -        | -      | -     | -       |               |
| P25    | DPZ0-3-9-10  | M   | 1 Yr | -        | +      | -        | -      | +     | -       | 2             |
| P26    | DPS1-3-10-8  | M   | 8 m. | -        |        |          |        | +     | -       | 1             |
| P27    | DPZ0-3-11-6  | M   | 1 Yr |          | +      |          | -      | -     | -       | 1             |
| P28    | DPZ0-3-11-7  | M   | 1 Yr |          | +      |          | -      | -     | -       | 1             |
| P29    | DPZ0-3-11-8  | M   | 1 Yr |          | +      | -        | -      | -     | -       | 1             |
| P30    | DPM2-3-12-10 | M   | 1 Yr | -        | +      | -        | -      | -     | -       | 1             |
| P31    | DPM2-3-12-11 | M   | 1 Yr | -        | -      | -        | -      | -     | -       |               |
| P32    | DPM2-3-12-12 | M   | 1 Yr | -        | -      | -        | -      | -     | -       |               |
| P33    | DPM2-3-12-13 | M   | 1 Yr | -        |        |          |        | -     | -       |               |
| P34    | DPM2-3-12-14 | M   | 1 Yr | -        |        |          |        | -     | -       |               |
| P35    | DPM2-3-13-12 | M   | 1 Yr | -        | -      | +        | -      | -     | -       | 1             |
| P36    | DPM2-3-13-13 | M   | 1 Yr | -        | -      | +        | +      | -     | -       | 2             |
| P37    | DPM2-3-13-14 | M   | 1 Yr | -        | -      | -        |        | -     | -       |               |

A '+' indicates the presence of disease; A '-' indicates the absence of disease. A blank cell indicates 'not evaluated.' Animal IDs with a 'C' belong to Control lineage and those with a 'P' belong to Pesticide lineage. See 'Materials and Methods' section for disease assessment in rats. The number of animals per litter (litter representation) mean  $\pm$  SEM used for each specific disease/abnormality was found not to be statistically different between the control versus pesticide lineage animals.

**Supplemental Table S4. List of rat sperm differential DNA methylation regions (DMR) found in F3-generation Pesticide lineage**

| Gene Symbol             | Chr | Start     | Stop      | Gene ID   | min p-value | Gene Title                                             |
|-------------------------|-----|-----------|-----------|-----------|-------------|--------------------------------------------------------|
| <b>Apoptosis</b>        |     |           |           |           |             |                                                        |
| Pdcd11                  | 1   | 252412922 | 252413522 | 309458    | 1.3E-09     | programmed cell death 11                               |
| Siva1                   | 6   | 137630549 | 137631439 | 362791    | 1.2E-12     | SIVA1, apoptosis-inducing factor                       |
| Card10                  | 7   | 116767137 | 116768035 | 315120    | 8.7E-08     | caspase recruitment domain family, member 10           |
| Tnfrsf12a               | 10  | 12940938  | 12942568  | 302965    | 5.2E-23     | tumor necrosis factor receptor superfamily, member 12a |
| Higd2a                  | 17  | 16084041  | 16084831  | 290999    | 2.4E-14     | HIG1 hypoxia inducible domain family, member 2A        |
| Tnfaip8                 | 18  | 45084538  | 45085228  | 307428    | 1.8E-13     | tumor necrosis factor, alpha-induced protein 8         |
| <b>Cell Cycle</b>       |     |           |           |           |             |                                                        |
| Cep55                   | 1   | 242381886 | 242382486 | 294074    | 3.8E-15     | centrosomal protein 55kDa                              |
| Cdk9                    | 3   | 11677067  | 11677767  | 362110    | 4.1E-08     | cyclin-dependent kinase 9                              |
| Cdk5                    | 4   | 6116554   | 6117864   | 140908    | 9.6E-10     | cyclin-dependent kinase 5                              |
| Cdk2                    | 7   | 2006927   | 2007527   | 362817    | 6.1E-09     | cyclin dependent kinase 2                              |
| Dock6                   | 8   | 20894272  | 20895262  | 367039    | 4.2E-20     | dedicator of cytokinesis 6                             |
| Gas8                    | 19  | 53834037  | 53834839  | 361438    | 2.4E-09     | growth arrest specific 8                               |
| Pak3                    | X   | 34841200  | 34842210  | 29433     | 4.9E-10     | p21 protein (Cdc42/Rac)-activated kinase 3             |
| <b>Cytoskeleton-ECM</b> |     |           |           |           |             |                                                        |
| Clec11a                 | 1   | 94792412  | 94793122  | 29313     | 8.0E-08     | C-type lectin domain family 11, member a               |
| Actn3                   | 1   | 207492038 | 207492749 | 171009    | 7.4E-10     | actinin alpha 3                                        |
| Add3                    | 1   | 259452730 | 259453611 | 25230     | 2.7E-13     | adducin 3 (gamma)                                      |
| Lmo1                    | 1   | 166741881 | 166742882 | 245979    | 3.4E-08     | LIM domain only 1                                      |
| Krtcap2                 | 2   | 181416132 | 181417032 | 295243    | 1.2E-10     | keratinocyte associated protein 2                      |
| Actl6a                  | 2   | 118918849 | 118919939 | 361925    | 9.2E-14     | actin-like 6A                                          |
| Flg                     | 2   | 186309317 | 186310200 | 24641     | 5.6E-12     | filaggrin                                              |
| Cercam                  | 3   | 8877244   | 8878133   | 296616    | 2.7E-10     | cerebral endothelial cell adhesion molecule            |
| LOC313641               | 5   | 156333892 | 156334783 | 313641    | 1.6E-10     | perlecan                                               |
| Tpm2                    | 5   | 60003516  | 60004592  | 500450    | 2.1E-09     | tropomyosin 2, beta                                    |
| Icam5                   | 8   | 20966220  | 20967039  | 313785    | 7.6E-09     | intercellular adhesion molecule 5, telencephalin       |
| Cspg5                   | 8   | 114620901 | 114621591 | 50568     | 7.1E-09     | chondroitin sulfate proteoglycan 5                     |
| LOC100363366            | 8   | 30972488  | 30973193  | 100363366 | 1.0E-12     | amyloid beta (A4) precursor-like protein 2-like        |
| Tpm1                    | 8   | 71356826  | 71357726  | 24851     | 2.3E-13     | tropomyosin 1, alpha                                   |
| Lasp1                   | 10  | 86551715  | 86552513  | 29278     | 5.6E-08     | LIM and SH3 protein 1                                  |
| Mapt                    | 10  | 93411242  | 93412032  | 29477     | 1.9E-07     | microtubule-associated protein tau                     |

| Gene Symbol        | Chr  | Start     | Stop      | Gene ID | min p-value | GeneTitle                                                    |
|--------------------|------|-----------|-----------|---------|-------------|--------------------------------------------------------------|
| Mrip               | 10   | 45975563  | 45976456  | 116504  | 7.5E-16     | myosin phosphatase Rho interacting protein                   |
| Snip               | 10   | 86320851  | 86321529  | 56029   | 1.0E-10     | SNAP25-interacting protein                                   |
| Snip               | 10   | 86323498  | 86324403  | 56029   | 9.7E-10     | SNAP25-interacting protein                                   |
| Ncam2              | 11   | 20423008  | 20423897  | 288280  | 7.4E-08     | neural cell adhesion molecule 2                              |
| Vcl                | 15   | 3575689   | 3576884   | 305679  | 1.1E-11     | vinculin                                                     |
| Fat1               | 16   | 50588806  | 50589905  | 83720   | 2.4E-13     | FAT tumor suppressor homolog 1 (Drosophila)                  |
| Tubb2a             | 17   | 37138997  | 37140410  | 498736  | 2.5E-17     | tubulin, beta 2a                                             |
| Vim                | 17   | 87847877  | 87848477  | 81818   | 1.8E-09     | vimentin                                                     |
| Pcdhb15            | 18   | 30286538  | 30287330  | 291646  | 1.1E-11     | protocadherin beta 15                                        |
| Cdh11              | 19   | 2225447   | 2226147   | 84407   | 3.1E-08     | cadherin 11                                                  |
| Lrg1               | Un/9 | 25672410  | 25673300  | 367455  | 2.1E-15     | leucine-rich alpha-2-glycoprotein 1                          |
| Plin5              | Un/9 | 25672410  | 25673300  | 501283  | 2.1E-15     | perilipin 5                                                  |
| <b>Development</b> |      |           |           |         |             |                                                              |
| Dmpk               | 1    | 78450272  | 78451687  | 308405  | 2.0E-23     | dystrophia myotonica-protein kinase                          |
| Ggn                | 1    | 84303670  | 84304575  | 292765  | 1.7E-07     | gametogenetin                                                |
| Ttyh1              | 1    | 69482346  | 69483230  | 292597  | 5.4E-13     | tweety homolog 1 (Drosophila)                                |
| Six5               | 1    | 78450272  | 78451687  | 308406  | 2.0E-23     | SIX homeobox 5                                               |
| Usmg5              | 1    | 252412922 | 252413522 | 171069  | 1.3E-09     | up-regulated during skeletal muscle growth 5 homolog (mouse) |
| Dkk2               | 2    | 229541018 | 229541911 | 295445  | 1.4E-09     | dickkopf homolog 2 (Xenopus laevis)                          |
| Sv2c               | 2    | 26554389  | 26554989  | 29643   | 2.6E-07     | synaptic vesicle glycoprotein 2c                             |
| Disp2              | 3    | 105283894 | 105284775 | 311324  | 7.9E-09     | dispatched homolog 2 (Drosophila)                            |
| Lhx6               | 3    | 15214211  | 15214897  | 311901  | 5.8E-08     | LIM homeobox 6                                               |
| Ntng2              | 3    | 8228607   | 8229412   | 311836  | 3.4E-18     | netrin G2                                                    |
| Qser1              | 3    | 90155661  | 90156556  | 311266  | 1.4E-09     | glutamine and serine rich 1                                  |
| SPATA2             | 3    | 158640784 | 158641479 | 114210  | 1.1E-14     | spermatogenesis associated 2                                 |
| SMO                | 4    | 56653034  | 56653704  | 25273   | 1.8E-13     | smoothed homolog (Drosophila)                                |
| Lbx2               | 4    | 117298557 | 117299157 | 500224  | 9.8E-11     | ladybird homeobox 2                                          |
| Bspry              | 5    | 79471177  | 79472257  | 64027   | 1.5E-08     | B-box and SPRY domain containing                             |
| Vwa1               | 5    | 172630371 | 172631649 | 298683  | 1.5E-09     | von Willebrand factor A domain containing 1                  |
| Npc2               | 6    | 108814526 | 108815606 | 286898  | 1.1E-45     | Niemann-Pick disease, type C2                                |
| Bre                | 6    | 24791954  | 24793149  | 362704  | 2.0E-09     | brain and reproductive organ-expressed protein               |
| Pmel               | 7    | 2006927   | 2007527   | 362818  | 6.1E-09     | premelanosome protein                                        |
| Trps1              | 7    | 87076226  | 87077245  | 299897  | 3.5E-15     | trichorhinophalangeal syndrome I homolog (human)             |
| Tmie               | 8    | 115269400 | 115270189 | 501061  | 5.3E-13     | transmembrane inner ear                                      |
| Mll1               | 8    | 47836284  | 47837266  | 315606  | 1.4E-08     | myeloid/lymphoid or mixed-lineage leukemia 1                 |

| Gene Symbol               | Chr | Start     | Stop      | Gene ID | min p-value | GeneTitle                                                                                           |
|---------------------------|-----|-----------|-----------|---------|-------------|-----------------------------------------------------------------------------------------------------|
| Aamp                      | 9   | 73610303  | 73611481  | 301512  | 3.2E-08     | angio-associated, migratory cell protein                                                            |
| Nlgn2                     | 10  | 56675163  | 56676245  | 117096  | 9.4E-13     | neuroligin 2                                                                                        |
| Nlgn2                     | 10  | 56678345  | 56679370  | 117096  | 4.8E-11     | neuroligin 2                                                                                        |
| Hoxb6                     | 10  | 85032294  | 85033194  | 497986  | 5.8E-18     | homeo box B6                                                                                        |
| Auts2                     | 12  | 25400693  | 25401534  | 498173  | 2.4E-14     | autism susceptibility candidate 2                                                                   |
| Pbx1                      | 13  | 84115851  | 84116728  | 304947  | 3.6E-09     | pre-B-cell leukemia homeobox 1                                                                      |
| Myog                      | 13  | 47243170  | 47244059  | 29148   | 3.9E-08     | myogenin                                                                                            |
| Pinx1                     | 15  | 43125066  | 43125666  | 305963  | 1.1E-14     | PIN2-interacting protein 1                                                                          |
| Unc13a                    | 16  | 18853366  | 18853966  | 64829   | 2.4E-08     | unc-13 homolog A (C. elegans)                                                                       |
| Irx2                      | 17  | 746309    | 746989    | 306657  | 8.4E-20     | iroquois homeobox 2                                                                                 |
| Irx5                      | 19  | 15751735  | 15752521  | 498918  | 1.2E-09     | iroquois homeobox 5                                                                                 |
| Nodal                     | 20  | 29546601  | 29547322  | 294503  | 1.9E-18     | nodal homolog (mouse)                                                                               |
| Bex2                      | X   | 123323586 | 123324186 | 363498  | 7.7E-09     | brain expressed X-linked 2                                                                          |
| Bex4                      | X   | 123441916 | 123442626 | 501624  | 8.9E-09     | brain expressed gene 4                                                                              |
| <b>DNA Repair</b>         |     |           |           |         |             |                                                                                                     |
| Rad54l2                   | 8   | 111984966 | 111985566 | 363135  | 3.7E-07     | Rad54 like 2 (S. cerevisiae)                                                                        |
| Electron Transport Cox6b2 | 1   | 67810664  | 67811751  | 654441  | 3.1E-08     | cytochrome c oxidase subunit VIb polypeptide 2                                                      |
| Prdx5                     | 1   | 209585932 | 209587138 | 113898  | 7.6E-17     | peroxiredoxin 5                                                                                     |
| Cyp24a1                   | 3   | 161553659 | 161554660 | 25279   | 1.3E-13     | cytochrome P450, family 24, subfamily a, polypeptide 1                                              |
| Cyp4f5                    | 7   | 13119902  | 13120699  | 286905  | 6.6E-25     | cytochrome P450, family 4, subfamily f, polypeptide 5                                               |
| Nxn1                      | 16  | 18769847  | 18771129  | 306342  | 5.1E-13     | nucleoredoxin-like 1                                                                                |
| <b>Epigenetics</b>        |     |           |           |         |             |                                                                                                     |
| Suv420h2                  | 1   | 67823420  | 67824426  | 308345  | 5.8E-10     | suppressor of variegation 4-20 homolog 2 (Drosophila) <histone-lysine N-methyltransferase SUV420H2> |
| Eed                       | 1   | 146589901 | 146590900 | 293104  | 7.2E-08     | embryonic ectoderm development                                                                      |
| Smarca2                   | 1   | 230016032 | 230016827 | 361745  | 2.8E-11     | SWI/SNF related, matrix associated, actin dependent regulator of chromatin, subfamily a, member 2   |
| CXXC4                     | 2   | 231704355 | 231705138 | 83824   | 3.5E-08     | CXXC finger 4                                                                                       |
| Setd5                     | 4   | 148949953 | 148951038 | 297514  | 3.4E-12     | SET domain containing 5                                                                             |
| H1f0                      | 7   | 117001353 | 117002342 | 24437   | 1.3E-12     | H1 histone family, member 0                                                                         |
| Cbx6                      | 7   | 118069182 | 118069782 | 315136  | 3.4E-10     | chromobox homolog 6                                                                                 |
| Satb2                     | 9   | 55824749  | 55825838  | 501145  | 3.2E-13     | SATB homeobox 2                                                                                     |
| Kdm6b                     | 10  | 56204571  | 56206172  | 363630  | 1.4E-16     | lysine (K)-specific demethylase 6B                                                                  |
| Phf15                     | 10  | 37379987  | 37381795  | 303113  | 1.2E-13     | PHD finger protein 15                                                                               |
| Tbx2                      | 10  | 74084425  | 74085225  | 303398  | 5.3E-33     | T-box 2                                                                                             |

| Gene Symbol            | Chr | Start     | Stop      | Gene ID | min p-value | GeneTitle                                                                             |
|------------------------|-----|-----------|-----------|---------|-------------|---------------------------------------------------------------------------------------|
| ASMT                   | 12  | 16815952  | 16816847  | 246281  | 8.8E-18     | acetylserotonin O-methyltransferase                                                   |
| Asmtl                  | 12  | 16824308  | 16825214  | 288527  | 1.0E-09     | acetylserotonin O-methyltransferase-like                                              |
| Kdm2b                  | 12  | 34672184  | 34673309  | 304495  | 3.8E-14     | lysine (K)-specific demethylase 2B                                                    |
| Gadd45g                | 17  | 19231639  | 19232721  | 291005  | 1.3E-18     | growth arrest and DNA-damage-inducible, gamma                                         |
| Hist1h2bn              | 17  | 50352153  | 50352753  | 291157  | 3.1E-17     | histone cluster 1, H2bn                                                               |
| Hdac3                  | 18  | 30875498  | 30876184  | 84578   | 3.2E-14     | histone deacetylase 3                                                                 |
| <b>Golgi Apparatus</b> |     |           |           |         |             |                                                                                       |
| B3gnt8                 | 1   | 80834920  | 80835615  | 308440  | 4.7E-09     | UDP-GlcNAc:betaGal beta-1,3-N-acetylglucosaminyltransferase 8                         |
| Mgat4b                 | 10  | 35775455  | 35776055  | 303100  | 7.2E-12     | mannosyl (alpha-1,3)-glycoprotein beta-1,4-N-acetylglucosaminyltransferase, isozyme B |
| <b>Growth Factors</b>  |     |           |           |         |             |                                                                                       |
| Gdnf                   | 2   | 57403318  | 57404513  | 25453   | 3.4E-22     | glial cell derived neurotrophic factor                                                |
| MDK                    | 3   | 76310613  | 76312125  | 81517   | 1.4E-13     | midkine                                                                               |
| Sspo                   | 4   | 76528498  | 76529282  | 474348  | 3.1E-12     | SCO-spondin                                                                           |
| Ntf3                   | 4   | 162504664 | 162505639 | 81737   | 3.7E-12     | neurotrophin 3                                                                        |
| WNT10B                 | 7   | 137545980 | 137547070 | 315294  | 1.3E-13     | wingless-type MMTV integration site family, member 10B                                |
| Dlk2                   | 9   | 10243248  | 10244843  | 316232  | 4.1E-07     | delta-like 2 homolog (Drosophila)                                                     |
| VEGFA                  | 9   | 10521846  | 10522726  | 83785   | 1.8E-07     | vascular endothelial growth factor A                                                  |
| Wnt3                   | 10  | 92946863  | 92947763  | 24882   | 9.3E-11     | wingless-type MMTV integration site family, member 3                                  |
| Sept5                  | 11  | 84364223  | 84365013  | 116728  | 2.4E-08     | septin 4                                                                              |
| Vgf                    | 12  | 20905109  | 20906021  | 29461   | 4.9E-10     | VGF nerve growth factor inducible                                                     |
| Hgfac                  | 14  | 81353598  | 81354616  | 58947   | 4.2E-15     | hepatocyte growth factor activator                                                    |
| Sept11                 | 14  | 16548270  | 16549455  | 305227  | 9.4E-19     | septin 11                                                                             |
| LTB                    | 20  | 3667367   | 3668263   | 361795  | 4.9E-07     | lymphotoxin beta (TNF superfamily, member 3)                                          |
| <b>Immune Response</b> |     |           |           |         |             |                                                                                       |
| Igsf10                 | 2   | 148733771 | 148734471 | 310448  | 1.1E-10     | immunoglobulin superfamily, member 10                                                 |
| Cd82                   | 3   | 77875422  | 77876242  | 83628   | 1.0E-10     | Cd82 molecule                                                                         |

| Gene Symbol                       | Chr | Start     | Stop      | Gene ID | min p-value | GeneTitle                                                                                               |
|-----------------------------------|-----|-----------|-----------|---------|-------------|---------------------------------------------------------------------------------------------------------|
| Cd276                             | 8   | 62361422  | 62362307  | 315716  | 1.5E-11     | Cd276 molecule                                                                                          |
| Spag7                             | 10  | 57548762  | 57549583  | 303260  | 4.8E-07     | sperm associated antigen 7                                                                              |
| Spag7                             | 10  | 57549874  | 57551068  | 303260  | 1.2E-13     | sperm associated antigen 7                                                                              |
| Fcgr2a                            | 13  | 86913190  | 86913875  | 116591  | 1.7E-13     | Fc fragment of IgG, low affinity Ila, receptor (CD32)                                                   |
| RT1-CE7                           | 20  | 3416588   | 3417188   | 368153  | 8.1E-18     | RT1 class I, locus CE7                                                                                  |
| RT1_CE13                          | 20  | 89064     | 90548     | 414790  | 1.1E-12     | RT1 class I, locus CE13                                                                                 |
| <b>Metabolism &amp; Transport</b> |     |           |           |         |             |                                                                                                         |
| ApoE                              | 1   | 79005645  | 79006565  | 25728   | 2.3E-12     | apolipoprotein E                                                                                        |
| Syt3                              | 1   | 94866084  | 94867099  | 25731   | 2.5E-10     | synaptotagmin III                                                                                       |
| Sult2b1                           | 1   | 96264926  | 96265526  | 292915  | 2.2E-06     | sulfotransferase family, cytosolic, 2B, member 1                                                        |
| Scd                               | 1   | 249358774 | 249359374 | 83792   | 6.1E-07     | stearoyl-CoA desaturase (delta-9-desaturase)                                                            |
| Syt7                              | 1   | 212877078 | 212877873 | 59267   | 9.0E-09     | synaptotagmin VII                                                                                       |
| Dhdpsl                            | 1   | 248805982 | 248806667 | 293949  | 2.2E-06     | dihydrodipicolinate synthase-like, mitochondrial                                                        |
| Fah                               | 1   | 140875689 | 140876469 | 29383   | 2.7E-13     | fumarylacetoacetate hydrolase                                                                           |
| Slc1a1                            | 1   | 232487265 | 232487865 | 25550   | 2.8E-11     | solute carrier family 1 (neuronal/epithelial high affinity glutamate transporter, system Xag), member 1 |
| Kcnn3                             | 2   | 181715756 | 181716441 | 54263   | 4.8E-13     | potassium intermediate/small conductance calcium-activated channel, subfamily N, member 3               |
| Slc25a31                          | 2   | 127697443 | 127698323 | 689108  | 1.2E-10     | solute carrier family 25 (mitochondrial carrier; adenine nucleotide translocator), member 31            |
| Slc30a5                           | 2   | 31636928  | 31637528  | 294698  | 2.4E-09     | solute carrier family 30 (zinc transporter), member 5                                                   |
| Slc7a14                           | 2   | 116461907 | 116462597 | 499587  | 1.4E-09     | solute carrier family 7 (cationic amino acid transporter, y+ system), member 14                         |
| Acox1                             | 3   | 115365654 | 115366254 | 296138  | 2.2E-09     | acyl-Coenzyme A oxidase-like                                                                            |
| Clstn3                            | 4   | 160665157 | 160666372 | 171393  | 1.1E-10     | calysntenin 3                                                                                           |
| Gapdh                             | 4   | 161285353 | 161286243 | 24383   | 3.7E-06     | glyceraldehyde-3-phosphate dehydrogenase                                                                |
| Mat2a                             | 4   | 105744927 | 105745527 | 171347  | 6.9E-15     | methionine adenosyltransferase II, alpha                                                                |
| Magi2                             | 4   | 11440081  | 11441061  | 113970  | 3.7E-15     | membrane associated guanylate kinase, WW and PDZ domain containing 2                                    |
| Sh3bgrl3                          | 5   | 152877492 | 152878472 | 298544  | 1.3E-10     | SH3 domain binding glutamic acid-rich protein-like 3                                                    |
| Echdc2                            | 5   | 129265151 | 129266066 | 298381  | 7.1E-09     | enoyl Coenzyme A hydratase domain containing 2                                                          |

| Gene Symbol | Chr | Start     | Stop      | Gene ID | min p-value | GeneTitle                                                                                            |
|-------------|-----|-----------|-----------|---------|-------------|------------------------------------------------------------------------------------------------------|
| Clstn1      | 5   | 166671398 | 166672378 | 313717  | 1.5E-16     | calsyntenin 1                                                                                        |
| Decr1       | 5   | 30519336  | 30520146  | 117543  | 2.3E-07     | 2,4-dienoyl CoA reductase 1, mitochondrial                                                           |
| Pusl1       | 5   | 172749107 | 172749787 | 362681  | 1.4E-10     | pseudouridylate synthase-like 1                                                                      |
| Rbks        | 6   | 24791954  | 24793149  | 362706  | 2.0E-09     | ribokinase                                                                                           |
| Srd5a2      | 6   | 21452565  | 21453390  | 64677   | 3.8E-09     | steroid-5-alpha-reductase, alpha polypeptide 2 (3-oxo-5 alpha-steroid delta 4-dehydrogenase alpha 2) |
| Pygl        | 6   | 92340725  | 92341524  | 64035   | 2.3E-08     | phosphorylase, glycogen, liver                                                                       |
| Rtn1        | 6   | 94681088  | 94681888  | 116644  | 1.3E-12     | reticulon 1                                                                                          |
| SLC39A3     | 7   | 10171471  | 10172556  | 314637  | 5.2E-08     | solute carrier family 39 (zinc transporter), member 3                                                |
| Cacnb3      | 7   | 137383447 | 137384546 | 25297   | 2.1E-10     | calcium channel, voltage-dependent, beta 3 subunit                                                   |
| Carm1       | 8   | 20650587  | 20651612  | 363026  | 8.2E-15     | coactivator-associated arginine methyltransferase 1                                                  |
| Pkm2        | 8   | 63486309  | 63487492  | 25630   | 2.5E-11     | pyruvate kinase, muscle                                                                              |
| Stt3a       | 8   | 38016123  | 38016924  | 500972  | 1.4E-10     | STT3, subunit of the oligosaccharyltransferase complex, homolog A (S. cerevisiae)                    |
| Accn4       | 9   | 74724160  | 74724955  | 63882   | 2.2E-10     | amiloride-sensitive cation channel 4, pituitary                                                      |
| Gnptg       | 10  | 14488661  | 14489341  | 287134  | 9.5E-11     | N-acetylglucosamine-1-phosphate transferase, gamma subunit                                           |
| Plscr3      | 10  | 56687180  | 56687875  | 360549  | 1.4E-09     | phospholipid scramblase 3                                                                            |
| KCNH4       | 10  | 89696676  | 89697576  | 114032  | 2.2E-08     | potassium voltage-gated channel, subfamily H (eag-related), member 4                                 |
| Slc9a3r1    | 10  | 105236801 | 105237401 | 59114   | 8.0E-08     | solute carrier family 9 (sodium/hydrogen exchanger), member 3 regulator 1                            |
| Clcn2       | 11  | 82426660  | 82427380  | 29232   | 3.9E-07     | chloride channel 2                                                                                   |
| Clcn2       | 11  | 82429579  | 82430269  | 29232   | 1.0E-08     | chloride channel 2                                                                                   |
| Atp6v1a     | 11  | 58125901  | 58126716  | 685232  | 2.1E-09     | ATPase, H <sup>+</sup> transporting, lysosomal V1 subunit A                                          |
| Acads       | 12  | 42765275  | 42765875  | 64304   | 1.1E-11     | acyl-Coenzyme A dehydrogenase, C-2 to C-3 short chain                                                |
| Gltp        | 12  | 43194112  | 43195012  | 288707  | 7.0E-08     | glycolipid transfer protein                                                                          |
| Mepce       | 12  | 19853018  | 19853828  | 304361  | 7.0E-11     | methylphosphate capping enzyme                                                                       |
| Nmnat2      | 13  | 67969800  | 67970695  | 289095  | 2.4E-23     | nicotinamide nucleotide adenyltransferase 2                                                          |
| Tomm40b     | 13  | 87111787  | 87112902  | 304971  | 5.8E-16     | translocase of outer mitochondrial membrane 40 homolog B (yeast)                                     |
| Rhbdd3      | 14  | 85758629  | 85759334  | 289753  | 1.7E-09     | rhomboid domain containing 3                                                                         |
| Enoph1      | 14  | 10859038  | 10860028  | 305177  | 1.6E-18     | enolase-phosphatase 1                                                                                |



| Gene Symbol                             | Chr | Start     | Stop      | Gene ID | min p-value | GeneTitle                                                                                |
|-----------------------------------------|-----|-----------|-----------|---------|-------------|------------------------------------------------------------------------------------------|
| Qdpr                                    | 14  | 70741367  | 70742367  | 64192   | 3.7E-11     | quinoid dihydropteridine reductase                                                       |
| Dpysl2                                  | 15  | 46412626  | 46413517  | 25416   | 1.6E-11     | dihydropyrimidinase-like 2                                                               |
| Slc6a7                                  | 18  | 56976220  | 56977132  | 117100  | 1.8E-09     | solute carrier family 6 (neurotransmitter transporter, L-proline), member 7              |
| Best2                                   | 19  | 24802086  | 24803166  | 364973  | 2.2E-14     | bestrophin 2                                                                             |
| Gpt2                                    | 19  | 22914732  | 22915711  | 307759  | 1.2E-08     | glutamic pyruvate transaminase (alanine aminotransferase) 2                              |
| Gstt2                                   | 20  | 13218263  | 13218863  | 29487   | 2.7E-07     | glutathione S-transferase, theta 2                                                       |
| Tap1                                    | 20  | 4789651   | 4790543   | 24811   | 2.9E-10     | transporter 1, ATP-binding cassette, sub-family B (MDR/TAP)                              |
| <b>Proteolysis</b>                      |     |           |           |         |             |                                                                                          |
| Ctsd                                    | 1   | 202632820 | 202633700 | 171293  | 8.6E-21     | cathepsin D                                                                              |
| Psm1                                    | 1   | 172248407 | 172249402 | 29668   | 4.0E-16     | proteasome (prosome, macropain) subunit, alpha type 1                                    |
| Serpinh1                                | 1   | 156673475 | 156674287 | 29345   | 1.9E-07     | serine (or cysteine) peptidase inhibitor, clade H, member 1                              |
| Ubxn11                                  | 5   | 152877492 | 152878472 | 192207  | 1.3E-10     | UBX domain protein 11                                                                    |
| Ubxn2b                                  | 5   | 19629204  | 19629903  | 312965  | 1.3E-12     | UBX domain protein 2B                                                                    |
| Adamts15                                | 7   | 10873782  | 10874784  | 300474  | 8.7E-17     | ADAM metallopeptidase with thrombospondin type 1 motif, 15                               |
| Prss1                                   | 7   | 11424819  | 11425640  | 408241  | 5.9E-15     | protease, serine-like 1                                                                  |
| Xpnpep3                                 | 7   | 119728411 | 119729114 | 685823  | 4.7E-07     | X-prolyl aminopeptidase (aminopeptidase P) 3, putative                                   |
| Ubl5                                    | 8   | 19661648  | 19662660  | 500954  | 3.3E-08     | ubiquitin-like 5                                                                         |
| AMZ2                                    | 10  | 98899341  | 98900231  | 360650  | 1.5E-07     | archaelysin family metallopeptidase 2                                                    |
| Tmub2                                   | 10  | 91364446  | 91365238  | 303567  | 2.4E-07     | transmembrane and ubiquitin-like domain containing 2                                     |
| Mmp17                                   | 12  | 28171455  | 28172150  | 288626  | 2.6E-13     | matrix metallopeptidase 17                                                               |
| Gene Symbol                             | Chr | Start     | Stop      | Gene ID | min p-value | GeneTitle                                                                                |
| Mmp2                                    | 19  | 15274320  | 15274920  | 81686   | 3.5E-10     | matrix metallopeptidase 2                                                                |
| Psm18                                   | 20  | 4789651   | 4790543   | 177046  | 2.9E-10     | proteasome (prosome, macropain) subunit, beta type 8 (large multifunctional peptidase 7) |
| Pi16                                    | 20  | 7642807   | 7643887   | 294312  | 5.6E-12     | peptidase inhibitor 16                                                                   |
| <b>Receptors &amp; Binding Proteins</b> |     |           |           |         |             |                                                                                          |
| Pvrl2                                   | 1   | 79058741  | 79060044  | 308417  | 1.2E-14     | poliovirus receptor-related 2                                                            |
| Nccrp1                                  | 1   | 83656823  | 83657423  | 292755  | 1.5E-07     | non-specific cytotoxic cell receptor protein 1 homolog (zebrafish)                       |
| Olr168                                  | 1   | 162485084 | 162485684 | 293315  | 5.0E-07     | olfactory receptor 168                                                                   |

| Gene Symbol      | Chr | Start     | Stop      | Gene ID | min p-value | GeneTitle                                                     |
|------------------|-----|-----------|-----------|---------|-------------|---------------------------------------------------------------|
| P2RY6            | 1   | 158376135 | 158377025 | 117264  | 1.0E-13     | pyrimidinergic receptor P2Y, G-protein coupled, 6             |
| Osbp             | 1   | 214811944 | 214812740 | 365410  | 4.2E-13     | oxysterol binding protein                                     |
| Ranbp3l          | 2   | 58725068  | 58726193  | 294789  | 1.0E-11     | RAN binding protein 3-like                                    |
| Olr414           | 3   | 163798239 | 163798839 | 56821   | 6.5E-07     | olfactory receptor 414                                        |
| Spsb2            | 4   | 160931316 | 160932317 | 297592  | 6.6E-23     | splA/ryanodine receptor domain and SOCS box containing 2      |
| Sec23a           | 6   | 79706895  | 79707495  | 58817   | 1.6E-08     | Sec23 homolog A (S. cerevisiae)                               |
| KISS1R           | 7   | 11291511  | 11292218  | 78976   | 5.5E-10     | KISS1 receptor                                                |
| Igfbp2           | 9   | 71966094  | 71967073  | 25662   | 2.2E-09     | insulin-like growth factor binding protein 2                  |
| Olr1415          | 10  | 44132028  | 44132628  | 405059  | 1.1E-06     | olfactory receptor 1415                                       |
| Il1rap           | 11  | 76225521  | 76226241  | 25466   | 5.2E-08     | interleukin 1 receptor accessory protein                      |
| Pvrl3            | 11  | 55842225  | 55843130  | 288124  | 2.4E-08     | poliovirus receptor-related 3                                 |
| IL3RA            | 12  | 16829845  | 16831365  | 246144  | 2.6E-09     | interleukin 3 receptor, alpha                                 |
| Opn3             | 13  | 91426959  | 91427559  | 498289  | 8.1E-12     | opsin 3                                                       |
| Aebp1            | 14  | 86524798  | 86525695  | 305494  | 1.2E-07     | AE binding protein 1                                          |
| Heatr1           | 17  | 68654760  | 68655860  | 361262  | 3.9E-09     | HEAT repeat containing 1                                      |
| Necab2           | 19  | 49691211  | 49692111  | 170928  | 2.3E-11     | N-terminal EF-hand calcium binding protein 2                  |
| Prrt1            | 20  | 4220107   | 4221198   | 406167  | 7.8E-20     | proline-rich transmembrane protein 1                          |
| Olr1687          | 20  | 4259416   | 4260219   | 309574  | 3.1E-07     | olfactory receptor 1687                                       |
| Olr1684          | 20  | 3497439   | 3498621   | 294151  | 1.8E-10     | olfactory receptor 1684                                       |
| <b>Signaling</b> |     |           |           |         |             |                                                               |
| Brsk1            | 1   | 67876013  | 67876613  | 499073  | 3.0E-08     | BR serine/threonine kinase 1                                  |
| Rabac1           | 1   | 80274216  | 80275308  | 83583   | 1.3E-14     | Rab acceptor 1 (prenylated)                                   |
| Inpp1            | 1   | 159291743 | 159292748 | 65038   | 7.0E-12     | inositol polyphosphate phosphatase-like 1                     |
| Calca            | 1   | 172690039 | 172691119 | 24241   | 9.8E-19     | calcitonin-related polypeptide alpha                          |
| Shank1           | 1   | 94792412  | 94793122  | 78957   | 8.0E-08     | SH3 and multiple ankyrin repeat domains 1                     |
| Cnksr3           | 1   | 37957713  | 37958623  | 308113  | 9.8E-18     | Cnksr family member 3                                         |
| Gene Symbol      | Chr | Start     | Stop      | Gene ID | min p-value | GeneTitle                                                     |
| Gng8             | 1   | 77218978  | 77219578  | 245986  | 3.0E-21     | guanine nucleotide binding protein (G protein), gamma 8       |
| Mrgprg           | 1   | 204155989 | 204156589 | 309133  | 2.2E-10     | MAS-related GPR, member G                                     |
| Cks1b            | 2   | 181615695 | 181616678 | 499655  | 3.2E-11     | CDC28 protein kinase regulatory subunit 1B                    |
| RAB13            | 2   | 182460590 | 182461570 | 81756   | 7.6E-27     | RAB13, member RAS oncogene family                             |
| Shc1             | 2   | 181615695 | 181616678 | 85385   | 3.2E-11     | SHC (Src homology 2 domain containing) transforming protein 1 |
| Ankrd34a         | 2   | 191395150 | 191396232 | 295283  | 5.7E-20     | ankyrin repeat domain 34A                                     |

| Gene Symbol | Chr | Start     | Stop      | Gene ID | min p-value | GeneTitle                                                                                     |
|-------------|-----|-----------|-----------|---------|-------------|-----------------------------------------------------------------------------------------------|
| ANP32E      | 2   | 190715161 | 190716362 | 361999  | 5.7E-18     | acidic (leucine-rich) nuclear phosphoprotein 32 family, member E                              |
| Egflam      | 2   | 56666235  | 56667515  | 365691  | 3.6E-11     | EGF-like, fibronectin type III and laminin G domains                                          |
| Notch2      | 2   | 192855441 | 192856541 | 29492   | 1.5E-19     | Notch homolog 2 (Drosophila)                                                                  |
| Ywhab       | 3   | 154925245 | 154926019 | 56011   | 2.1E-11     | tyrosine 3-monooxygenase/tryptophan 5-monooxygenase activation protein, beta polypeptide      |
| Tyro3       | 3   | 106308759 | 106310151 | 25232   | 1.3E-08     | TYRO3 protein tyrosine kinase                                                                 |
| Ptprz1      | 4   | 49267340  | 49268020  | 25613   | 1.7E-09     | protein tyrosine phosphatase, receptor-type, Z polypeptide 1                                  |
| Acap3       | 5   | 172749107 | 172749787 | 313772  | 1.4E-10     | ArfGAP with coiled-coil, ankyrin repeat and PH domains 3                                      |
| LOC683719   | 5   | 86273089  | 86273964  | 683719  | 1.2E-11     | similar to RAS and EF hand domain containing                                                  |
| Lpar1       | 5   | 76571751  | 76572551  | 116744  | 2.0E-13     | lysophosphatidic acid receptor 1                                                              |
| Pink1       | 5   | 157102069 | 157102960 | 298575  | 4.5E-09     | PTEN induced putative kinase 1                                                                |
| Akap6       | 6   | 73042917  | 73043604  | 64553   | 9.4E-61     | A kinase (PRKA) anchor protein 6                                                              |
| Itga7       | 7   | 2229865   | 2231454   | 81008   | 4.2E-11     | integrin, alpha 7                                                                             |
| Palm        | 7   | 11424819  | 11425640  | 170673  | 5.9E-15     | paralemmin                                                                                    |
| Shc2        | 7   | 11583824  | 11584614  | 314612  | 2.4E-16     | SHC (Src homology 2 domain containing) transforming protein 2                                 |
| Grina       | 7   | 114277254 | 114278461 | 266668  | 2.9E-19     | glutamate receptor, ionotropic, N-methyl D-aspartate-associated protein 1 (glutamate binding) |
| Mapk11      | 7   | 127449653 | 127450253 | 689314  | 2.4E-17     | mitogen-activated protein kinase 11                                                           |
| MAPK8IP2    | 7   | 127772817 | 127773697 | 315220  | 3.0E-08     | mitogen-activated protein kinase 8 interacting protein 2                                      |
| Shank3      | 7   | 127816023 | 127816717 | 59312   | 1.7E-26     | SH3 and multiple ankyrin repeat domains 3                                                     |
| Itga5       | 7   | 142276341 | 142277241 | 315346  | 5.0E-11     | integrin, alpha 5 (fibronectin receptor, alpha polypeptide)                                   |
| Anp32a      | 8   | 66488052  | 66489373  | 25379   | 1.6E-08     | acidic (leucine-rich) nuclear phosphoprotein 32 family, member A                              |
| Calml4      | 8   | 67005516  | 67006116  | 691455  | 1.7E-25     | calmodulin-like 4                                                                             |
| Snx33       | 8   | 60673757  | 60674357  | 315696  | 1.4E-27     | sorting nexin 33                                                                              |
| Efnb3       | 10  | 56378095  | 56379587  | 360546  | 2.0E-28     | ephrin B3                                                                                     |
| Anxa6       | 10  | 40438545  | 40439245  | 79125   | 7.7E-11     | annexin A6                                                                                    |
| PLEKHH3     | 10  | 90191441  | 90192426  | 360634  | 2.2E-10     | pleckstrin homology domain containing, family H (with MyTH4 domain) member 3                  |

| Gene Symbol          | Chr | Start     | Stop      | Gene ID | min p-value | GeneTitle                                                                                   |
|----------------------|-----|-----------|-----------|---------|-------------|---------------------------------------------------------------------------------------------|
| Ywhae                | 10  | 63072423  | 63073223  | 29753   | 9.8E-07     | tyrosine 3-monooxygenase/tryptophan 5-monooxygenase activation protein, epsilon polypeptide |
| Camk2n2              | 11  | 82519950  | 82520632  | 59314   | 4.5E-09     | calcium/calmodulin-dependent protein kinase II inhibitor 2                                  |
| Akap17a              | 12  | 16824308  | 16825214  | 288526  | 1.0E-09     | A kinase (PRKA) anchor protein 17A                                                          |
| Gnb2                 | 12  | 19601090  | 19602388  | 81667   | 8.9E-22     | guanine nucleotide binding protein (G protein), beta polypeptide 2                          |
| Ptprg                | 15  | 15129826  | 15130718  | 171357  | 1.2E-07     | protein tyrosine phosphatase, receptor type, G                                              |
| Dda1                 | 16  | 18640032  | 18640843  | 688813  | 1.8E-08     | DET1 and DDB1 associated 1                                                                  |
| Gtpbp3               | 16  | 18656594  | 18657490  | 290633  | 2.7E-08     | GTP binding protein 3                                                                       |
| Dusp26               | 16  | 64958383  | 64959068  | 306527  | 1.3E-09     | dual specificity phosphatase 26 (putative)                                                  |
| Psd2                 | 18  | 28594728  | 28596406  | 307500  | 2.5E-07     | pleckstrin and Sec7 domain containing 2                                                     |
| Pdp2                 | 19  | 31389541  | 31390235  | 246311  | 2.4E-09     | pyruvate dehydrogenase phosphatase catalytic subunit 2                                      |
| Ppp1r10              | 20  | 2984086   | 2984883   | 65045   | 2.8E-26     | protein phosphatase 1, regulatory subunit 10                                                |
| Gucy1a2              | Un  | 47455432  | 47456222  | 66012   | 8.1E-11     | guanylate cyclase 1, soluble, alpha 2                                                       |
| Ptprs                | Un  | 25300105  | 25300805  | 25529   | 2.5E-16     | protein tyrosine phosphatase, receptor type, S                                              |
| Gprasp1              | X   | 1331319   | 1331919   | 171407  | 4.1E-08     | G protein-coupled receptor associated sorting protein 1                                     |
| <b>Transcription</b> |     |           |           |         |             |                                                                                             |
| Myopop               | 1   | 78344996  | 78345976  | 499090  | 8.1E-08     | Myb-related transcription factor, partner of profilin                                       |
| Cic                  | 1   | 80557664  | 80558744  | 308435  | 6.2E-20     | capicua homolog (Drosophila)                                                                |
| Clip3                | 1   | 85238795  | 85239697  | 308493  | 6.2E-08     | CAP-GLY domain containing linker protein 3                                                  |
| Scaf1                | 1   | 95488479  | 95489374  | 56081   | 2.8E-11     | SR-related CTD-associated factor 1                                                          |
| Zc3h12d              | 1   | 250472051 | 250472651 | 308266  | 2.0E-06     | zinc finger CCCH type containing 12D                                                        |
| PITX3                | 1   | 251356410 | 251357495 | 29609   | 4.3E-42     | paired-like homeodomain 3                                                                   |
| Nr2f2                | 1   | 125286094 | 125286799 | 113984  | 4.3E-10     | nuclear receptor subfamily 2, group F, member 2                                             |
| Pax2                 | 1   | 249895584 | 249896463 | 293992  | 2.3E-09     | paired box 2                                                                                |
| Zfp687               | 2   | 189914894 | 189915882 | 310660  | 2.0E-12     | zinc finger protein 687                                                                     |
| Mov10                | 2   | 200075206 | 200076102 | 310756  | 1.9E-08     | Moloney leukemia virus 10                                                                   |
| Nras                 | 2   | 198292829 | 198293429 | 24605   | 3.1E-18     | neuroblastoma ras oncogene                                                                  |
| Rai14                | 2   | 60059148  | 60059838  | 294804  | 8.4E-09     | retinoic acid induced 14                                                                    |
| Nfe2l2               | 3   | 58393873  | 58394894  | 83619   | 1.5E-10     | nuclear factor, erythroid derived 2, like 2                                                 |
| Nr4a2                | 3   | 38872480  | 38873296  | 54278   | 3.1E-08     | nuclear receptor subfamily 4, group A, member 2                                             |

| Gene Symbol | Chr | Start     | Stop      | Gene ID | min p-value | GeneTitle                                              |
|-------------|-----|-----------|-----------|---------|-------------|--------------------------------------------------------|
| Scrt2       | 3   | 142434466 | 142435066 | 366229  | 1.1E-07     | scratch homolog 2, zinc finger protein (Drosophila)    |
| Sp5         | 3   | 52695364  | 52696343  | 296510  | 1.2E-09     | Sp5 transcription factor                               |
| Abtb1       | 4   | 122936490 | 122937308 | 297432  | 4.9E-09     | ankyrin repeat and BTB (POZ) domain containing 1       |
| Ing3        | 4   | 48255109  | 48255809  | 312154  | 2.0E-19     | inhibitor of growth family, member 3                   |
| Ahdc1       | 5   | 152101596 | 152102486 | 362617  | 9.3E-15     | AT hook, DNA binding motif, containing 1               |
| Fbxo2       | 5   | 165237874 | 165238963 | 85273   | 4.9E-19     | F-box protein 2                                        |
| Med8        | 5   | 138890220 | 138890995 | 362575  | 1.3E-09     | mediator complex subunit 8                             |
| NR4A3       | 5   | 64719277  | 64719987  | 58853   | 5.2E-16     | nuclear receptor subfamily 4, group A, member 3        |
| RGD1563216  | 6   | 108814526 | 108815606 | 500694  | 1.1E-45     | similar to HESB like domain containing 1               |
| Sp8         | 6   | 146168329 | 146168929 | 299499  | 2.1E-08     | Sp8 transcription factor                               |
| Dnajc14     | 7   | 2104216   | 2104816   | 114481  | 9.4E-11     | DnaJ (Hsp40) homolog, subfamily C, member 14           |
| Scx         | 7   | 114503595 | 114504375 | 680712  | 8.6E-20     | scleraxis                                              |
| Dnajc22     | 7   | 137872861 | 137874254 | 362998  | 1.1E-13     | DnaJ (Hsp40) homolog, subfamily C, member 22           |
| Zfp385a     | 7   | 142249435 | 142250435 | 685474  | 4.4E-12     | zinc finger protein 385A                               |
| Nr4a1       | 7   | 140012571 | 140013171 | 79240   | 1.6E-18     | nuclear receptor subfamily 4, group A, member 1        |
| Arid3b      | 8   | 61607737  | 61608550  | 367092  | 5.6E-09     | AT rich interactive domain 3B (Bright like)            |
| Bcl9l       | 8   | 47449901  | 47450705  | 300673  | 5.0E-14     | B-cell CLL/lymphoma 9-like                             |
| Klhdc3      | 9   | 10051392  | 10053207  | 363192  | 5.2E-11     | kelch domain containing 3                              |
| Foxp4       | 9   | 8507797   | 8508795   | 363185  | 1.2E-09     | forkhead box P4                                        |
| HOXB7       | 10  | 85016559  | 85017435  | 497985  | 4.9E-07     | homeo box B7                                           |
| Nfe2l1      | 10  | 85586351  | 85587341  | 360610  | 3.5E-12     | nuclear factor, erythroid derived 2,-like 1            |
| Scand3      | 12  | 27861394  | 27861994  | 288622  | 1.8E-09     | SCAN domain containing 3                               |
| Higd2a1     | 12  | 1366187   | 1366787   | 688606  | 3.9E-10     | HIG1 hypoxia inducible domain family, member 2A-like 1 |
| Ewsr1       | 14  | 85758629  | 85759334  | 289752  | 1.7E-09     | Ewing sarcoma breakpoint region 1                      |
| Ndrp2       | 15  | 27346566  | 27347666  | 171114  | 4.8E-28     | N-myc downstream regulated gene 2                      |
| Zic5        | 15  | 107598237 | 107599053 | 361095  | 2.9E-10     | Zic family member 5 (odd-paired homolog, Drosophila)   |
| Id4         | 17  | 22528169  | 22528964  | 291023  | 4.3E-13     | inhibitor of DNA binding 4                             |
| Arid4b      | 17  | 59458282  | 59459273  | 84481   | 9.8E-09     | AT rich interactive domain 4B (Rbp1 like)              |
| Gata6       | 18  | 2502507   | 2503598   | 29300   | 2.8E-09     | GATA binding protein 6                                 |
| LOC685382   | 18  | 15772845  | 15773445  | 685382  | 8.9E-13     | similar to Proline-rich nuclear receptor coactivator 1 |
| Znf521      | 18  | 5147539   | 5148225   | 307579  | 3.5E-08     | zinc finger protein 521                                |
| LYL1        | 19  | 25113855  | 25114855  | 304663  | 7.9E-22     | lymphoblastic leukemia derived sequence 1              |

| Gene Symbol                                   | Chr | Start     | Stop      | Gene ID | min p-value | GeneTitle                                                   |
|-----------------------------------------------|-----|-----------|-----------|---------|-------------|-------------------------------------------------------------|
| Nudt7                                         | 19  | 41441292  | 41442411  | 361413  | 3.4E-15     | nudix (nucleoside diphosphate linked moiety X)-type motif 7 |
| Armcx2                                        | X   | 122265349 | 122266438 | 367903  | 4.0E-29     | armadillo repeat containing, X-linked 2                     |
| Zmym3                                         | X   | 89491287  | 89491987  | 317260  | 3.0E-09     | zinc finger, MYM-type 3                                     |
| <b>Translation &amp; Protein Modification</b> |     |           |           |         |             |                                                             |
| Tarsl2                                        | 1   | 120049966 | 120051055 | 308701  | 4.0E-13     | threonyl-tRNA synthetase-like 2                             |
| Pth1                                          | 3   | 11749922  | 11750919  | 362113  | 7.0E-11     | peptidyl-tRNA hydrolase 1 homolog (S. cerevisiae)           |
| Rps8                                          | 5   | 137468053 | 137469043 | 65136   | 2.4E-08     | ribosomal protein S8                                        |
| Padi2                                         | 5   | 159761520 | 159762334 | 29511   | 6.7E-12     | peptidyl arginine deiminase, type II                        |
| Rpl8                                          | 7   | 114953948 | 114955044 | 26962   | 1.0E-10     | ribosomal protein L8                                        |
| Syncrip                                       | 8   | 93822110  | 93822710  | 363113  | 9.8E-12     | synaptotagmin binding, cytoplasmic RNA interacting protein  |
| Igf2bp1                                       | 10  | 84714285  | 84715211  | 303477  | 1.6E-12     | insulin-like growth factor 2 mRNA binding protein 1         |
| Npm1                                          | 10  | 18062093  | 18062873  | 25498   | 2.0E-19     | nucleophosmin (nucleolar phosphoprotein B23, numatrin)      |
| Eif4g1                                        | 11  | 82470316  | 82471209  | 287986  | 1.6E-12     | eukaryotic translation initiation factor 4 gamma, 1         |
| Hnrpdl                                        | 14  | 10859038  | 10860028  | 305179  | 1.6E-18     | heterogeneous nuclear ribonucleoprotein D-like              |
| Aars                                          | 19  | 38413210  | 38414035  | 292023  | 1.1E-07     | alanyl-tRNA synthetase                                      |
| Mrps18b                                       | 20  | 2984086   | 2984883   | 294230  | 2.8E-26     | mitochondrial ribosomal protein S18B                        |
| Rpl36                                         | Un  | 25163917  | 25164597  | 58927   | 4.1E-24     | ribosomal protein L36                                       |
| <b>Miscellaneous &amp; Unknown</b>            |     |           |           |         |             |                                                             |
| RGD1565346                                    | 1   | 93660805  | 93661590  | 499139  | 1.0E-10     | similar to expressed sequence C80587                        |
| RGD1565305                                    | 1   | 93866197  | 93866982  | 499141  | 9.8E-10     | similar to RIKEN cDNA 4931406B18                            |
| Tmem160                                       | 1   | 76716621  | 76717399  | 292654  | 1.3E-07     | transmembrane protein 160                                   |
| Trim3                                         | 1   | 163361976 | 163362576 | 83616   | 5.1E-08     | tripartite motif-containing 3                               |
| Tsku                                          | 1   | 155621658 | 155622558 | 308843  | 6.0E-36     | tsukushin                                                   |
| NSCAN pred chr1.1565.a                        | 1   | 176442929 | 176443636 |         | 1.1E-07     |                                                             |
| RGD1307615                                    | 3   | 3780798   | 3781496   | 362084  | 9.2E-11     | similar to hypothetical protein FLJ13045                    |
| RGD1311517                                    | 5   | 172951361 | 172952061 | 313775  | 1.4E-07     | similar to RIKEN cDNA 9430015G10                            |
| Gene Symbol                                   | Chr | Start     | Stop      | Gene ID | min p-value | GeneTitle                                                   |
| Wdr8                                          | 5   | 171103703 | 171104382 | 366515  | 5.4E-08     | WD repeat domain 8                                          |
| NSCAN pred chr5.714.a                         | 5   | 125316795 | 125317615 |         | 1.6E-07     |                                                             |
| Birc6                                         | 6   | 20847680  | 20848580  | 313876  | 3.5E-13     | baculoviral IAP repeat-containing 6                         |
| Crip                                          | 6   | 138159304 | 138160009 | 691657  | 2.4E-10     | cysteine-rich intestinal protein                            |

| Gene Symbol                | Chr | Start     | Stop      | Gene ID   | min p-value | GeneTitle                                     |
|----------------------------|-----|-----------|-----------|-----------|-------------|-----------------------------------------------|
| Wdr35l                     | 6   | 32462311  | 32462988  | 503018    | 5.7E-10     | WD repeat domain 35-like                      |
| NSCAN pred chr6.1025.a     | 6   | 143691197 | 143692302 |           | 5.8E-12     |                                               |
| NSCAN pred chr8.1119.a     | 8   | 123867973 | 123869170 |           | 3.3E-11     |                                               |
| NSCAN pred chr8.784.a      | 8   | 85203182  | 85203992  |           | 2.3E-07     |                                               |
| NSCAN pred chr8.1047.a     | 8   | 114860374 | 114861274 |           | 6.7E-13     |                                               |
| Nme3                       | 10  | 14145576  | 14146376  | 85269     | 1.5E-09     | non-metastatic cells 3, protein expressed in  |
| Tmem95                     | 10  | 56720709  | 56721596  | 691982    | 3.7E-09     | transmembrane protein 95                      |
| Fam117a                    | 10  | 84021838  | 84023150  | 497983    | 8.9E-09     | family with sequence similarity 117, member A |
| RGD1565744                 | 10  | 14488661  | 14489341  | 360494    | 9.5E-11     | similar to RIKEN cDNA 0610007P22              |
| RGD1311899                 | 12  | 42954418  | 42955018  | 288704    | 2.7E-09     | similar to RIKEN cDNA 2210016L21 gene         |
| RGD1560846                 | 12  | 6095843   | 6096542   | 498133    | 3.5E-13     | similar to hypothetical protein MGC40178      |
| rCG21620-like              | 12  | 34588608  | 34589612  | 100359816 | 3.0E-12     | rCG21620-like                                 |
| NSCAN pred chr12.007.a     | 12  | 1019708   | 1020388   |           | 5.4E-10     |                                               |
| Fam72a                     | 13  | 44451758  | 44452849  | 681249    | 1.1E-10     | family with sequence similarity 72, member A  |
| RGD1307161                 | 13  | 99339499  | 99340519  | 305031    | 2.0E-22     | similar to 0610010K06Rik protein              |
| NSCAN pred chr14.352.a     | 14  | 49589568  | 49590168  |           | 2.2E-11     |                                               |
| NSCAN pred chr17.082.a     | 17  | 12540665  | 12541742  |           | 7.5E-11     |                                               |
| RGD1562080                 | 18  | 12945779  | 12946669  | 498827    | 7.3E-11     | similar to Hypothetical protein CBG10141      |
| NSCAN pred chr19.598.a     | 19  | 56135908  | 56136508  |           | 4.5E-08     |                                               |
| NSCAN chr20.066.a          | 20  | 3442365   | 3443350   |           | 8.6E-23     |                                               |
| RGD1560927                 | X   | 7709114   | 7709808   | 501507    | 6.1E-09     | RGD1560927                                    |
| NSCAN pred chrX.046.a      | X   | 7961753   | 7962453   |           | 3.4E-09     |                                               |
| NSCAN pred chrX.568.a      | X   | 90946064  | 90947069  |           | 1.6E-09     |                                               |
| EST's                      |     |           |           |           |             |                                               |
| RGD1561205                 | 5   | 149686351 | 149687140 | 500557    | 1.1E-07     |                                               |
| RGD1562342                 | 7   | 2104216   | 2104816   | 500762    | 9.4E-11     | similar to RIKEN cDNA 1110012D08              |
| RGD1563441                 | 10  | 56132674  | 56133469  | 497935    | 3.0E-07     | similar to RIKEN cDNA A030009H04              |
| TL0ABA42YC21 mRNA sequence | 20  | 6067533   | 6068428   |           | 7.7E-12     |                                               |

**Supplementary Table S5.** Top KEGG Pathways Enriched with Pesticide lineage gene lists

| <b>Pathway Name</b>                         | <b># Genes Affected</b> | <b># Genes in Pathway</b> | <b>Impact Factor</b> |
|---------------------------------------------|-------------------------|---------------------------|----------------------|
| MAPK signaling pathway                      | 8                       | 253                       | 2.11                 |
| Focal adhesion                              | 8                       | 187                       | 5.7                  |
| Pathways in cancer                          | 8                       | 321                       | 1.9                  |
| Phagosome                                   | 7                       | 191                       | NA                   |
| Cell adhesion molecules (CAMs)              | 7                       | 151                       | 5.5                  |
| Neurotrophin signaling pathway              | 7                       | 129                       | NA                   |
| Regulation of actin cytoskeleton            | 6                       | 204                       | 2.9                  |
| HTLV-I infection                            | 6                       | 296                       | NA                   |
| Chemokine signaling pathway                 | 5                       | 178                       | NA                   |
| Axon guidance                               | 5                       | 123                       | 3.8                  |
| Glutamatergic synapse                       | 5                       | 130                       | NA                   |
| Alzheimer's disease                         | 5                       | 213                       | 1.3                  |
| Herpes simplex infection                    | 5                       | 207                       | NA                   |
| Transcriptional misregulation in cancers    | 5                       | 182                       | NA                   |
| Hypertrophic cardiomyopathy (HCM)           | 5                       | 85                        | NA                   |
| Dilated cardiomyopathy                      | 5                       | 94                        | NA                   |
| ErbB signaling pathway                      | 4                       | 83                        | 3.7                  |
| Cytokine-cytokine receptor interaction      | 4                       | 193                       | 1.4                  |
| Cell cycle                                  | 4                       | 117                       | 1.6                  |
| Protein processing in endoplasmic reticulum | 4                       | 165                       | NA                   |
| Endocytosis                                 | 4                       | 231                       | NA                   |
| Cardiac muscle contraction                  | 4                       | 81                        | 3.4                  |
| Wnt signaling pathway                       | 4                       | 142                       | 2.1                  |
| VEGF signaling pathway                      | 4                       | 69                        | 4.3                  |



| <b>Pathway Name</b>                                    | <b># Genes Affected</b> | <b># Genes in Pathway</b> | <b>Impact Factor</b> |
|--------------------------------------------------------|-------------------------|---------------------------|----------------------|
| Adherens junction                                      | 4                       | 73                        | 3.6                  |
| Tight junction                                         | 4                       | 128                       | 1.9                  |
| Gap junction                                           | 4                       | 90                        | 2.8                  |
| Natural killer cell mediated cytotoxicity              | 4                       | 98                        | 2.7                  |
| Leukocyte transendothelial migration                   | 4                       | 116                       | 2.2                  |
| Olfactory transduction                                 | 4                       | 732                       | 0.003                |
| Insulin signaling pathway                              | 4                       | 130                       | 2.9                  |
| Parkinson's disease                                    | 4                       | 157                       | 1.7                  |
| Bacterial invasion of epithelial cells                 | 4                       | 72                        | NA                   |
| Arrhythmogenic right ventricular cardiomyopathy (ARVC) | 4                       | 73                        | NA                   |
| Purine metabolism                                      | 3                       | 169                       | NA                   |
| Ribosome                                               | 3                       | 77                        | 2.1                  |
| Neuroactive ligand-receptor interaction                | 3                       | 259                       | 0.2                  |
| Oocyte meiosis                                         | 3                       | 115                       | NA                   |
| p53 signaling pathway                                  | 3                       | 67                        | NA                   |
| Lysosome                                               | 3                       | 124                       | NA                   |
| Hedgehog signaling pathway                             | 3                       | 51                        | 2.9                  |
| ECM-receptor interaction                               | 3                       | 74                        | 2.2                  |
| Antigen processing and presentation                    | 3                       | 100                       | 2.0                  |
| T cell receptor signaling pathway                      | 3                       | 110                       | 1.3                  |
| Cholinergic synapse                                    | 3                       | 112                       | NA                   |
| Serotonergic synapse                                   | 3                       | 132                       | NA                   |
| Dopaminergic synapse                                   | 3                       | 132                       | NA                   |
| GnRH signaling pathway                                 | 3                       | 91                        | 1.7                  |

| <b>Pathway Name</b>          | <b># Genes Affected</b> | <b># Genes in Pathway</b> | <b>Impact Factor</b> |
|------------------------------|-------------------------|---------------------------|----------------------|
| Melanogenesis                | 3                       | 96                        | 1.6                  |
| Tuberculosis                 | 3                       | 69                        | NA                   |
| Renal cell carcinoma         | 3                       | 69                        | 2.2                  |
| Glioma                       | 3                       | 64                        | 2.4                  |
| Prostate cancer              | 3                       | 91                        | 1.7                  |
| Basal cell carcinoma         | 3                       | 51                        | 3.0                  |
| Bladder cancer               | 3                       | 36                        | 3.8                  |
| Chronic myeloid leukemia     | 3                       | 78                        | 2.1                  |
| Systemic lupus erythematosus | 3                       | 114                       | 1.6                  |
| Rheumatoid arthritis         | 3                       | 90                        | NA                   |
| Viral myocarditis            | 3                       | 109                       | NA                   |

The KEGG pathway with number of associated DMR genes, total number of genes in pathway, and calculated impact factor (Wayne State University, Intelligent Systems and Bioinformatics Laboratory, [www.vortex.cs.wayne.edu/ontoexpress](http://www.vortex.cs.wayne.edu/ontoexpress)) presented. The NA indicates not available.
